# Palaeobiological inferences based on long bone epiphyseal and diaphyseal structure - the forelimb of xenarthrans (Mammalia)

Eli Amson<sup>1,2</sup>, John A Nyakatura<sup>2</sup>

<sup>1</sup>Museum für Naturkunde, Leibniz-Institut für Evolutions- und Biodiversitätsforschung, Berlin, Germany; [eli.amson@mfn.berlin](mailto:eli.amson@mfn.berlin)

<sup>2</sup>AG Morphologie und Formengeschichte, Institut für Biologie & Bild Wissen Gestaltung. Ein interdisziplinäres Labor, Humboldt-Universität, Berlin, Germany; [eli.amson@hu-berlin.de](mailto:eli.amson@hu-berlin.de)

## ORCID

0000-0003-1474-9613 (Eli Amson)

0000-0001-8088-8684 (John A Nyakatura)

## ABSTRACT

Trabecular architecture (i.e., the main orientation of the bone trabeculae, their number, mean thickness, spacing, etc.) has been shown experimentally to adapt with great accuracy and sensitivity to the loadings applied to the bone during life. However, the potential of trabecular parameters used as a proxy for the mechanical environment of an organism's organ to help reconstruct the lifestyle of extinct taxa has only recently started to be exploited. Furthermore, these parameters are rarely combined to the long-used mid-diaphyseal parameters to inform such reconstructions. Here we investigate xenarthrans, for which functional and ecological reconstructions of extinct forms are particularly important in order to improve our macroevolutionary understanding of their main constitutive clades, i.e., the Tardigrada (sloths), Vermilingua (anteaters), and Cingulata (armadillos and extinct close relatives). The lifestyles of modern xenarthrans can be classified as fully terrestrial and highly fossorial (armadillos), arboreal (partly to fully) and hook-and-pull digging (anteaters), or suspensory (fully arboreal) and non-fossorial (sloths). The degree of arboreality and fossoriality of some extinct forms, "ground sloths" in particular, is highly debated. We used high-resolution computed tomography to compare the epiphyseal 3D architecture and mid-diaphyseal structure of the forelimb bones of extant and extinct xenarthrans. The comparative approach employed aims at inferring the most probable lifestyle of extinct taxa, using phylogenetically informed discriminant analyses. Several challenges preventing the attribution of one of the extant xenarthran lifestyles to the sampled extinct sloths were identified. Differing from that of the larger "ground sloths", the bone structure of the small-sized *Hapalops* (Miocene of Argentina), however, was found as significantly more similar to that of extant sloths, even when accounting for the phylogenetic signal.

Keywords: Bone structure; Forelimb; Locomotion; Palaeobiological inferences; Trabeculae; Xenarthra

## 1 INTRODUCTION

2 Bone structure is intensively studied in  
3 analyses concerned with functional anatomy  
4 because it is argued to be extremely plastic. While  
5 a genetic blueprint influences bone structure, it has  
6 been shown to adapt during life (and especially at  
7 an early ontogenetic stage) to its mechanical  
8 environment (Ruff et al. 2006). This was argued for

9 trabecular bone, which reacts to loading with great  
10 accuracy and sensitivity (Barak et al. 2011). This  
11 was also argued for cortical bone, even though the  
12 latter is expected to be less plastic, at least in part  
13 due to its lower remodeling rate (see review of  
14 Kivell, 2016). Comparative studies focusing on  
15 either trabeculae or cortical structure intend to  
16 leverage this great plasticity to associate structural  
17 phenotypes to lifestyles or functional uses of a  
18 limb. This has been achieved in some analyses (as

PREPRINT

19 recently exemplified by Georgiou et al. 2018; Ryan  
20 et al. 2018; Tsegai et al. 2018) but not all of them  
21 (see review of Kivell 2016), suggesting that some  
22 confounding factors are likely to be at play, and  
23 more generally that the approach is limited. For  
24 trabecular bone in particular, important  
25 intraspecific variation has been documented (e.g.,  
26 in *Pongo*; Tsegai et al. 2013; Georgiou et al.  
27 2018). Nevertheless, the fact that some analyses  
28 successfully distinguished ecological groups might  
29 indicate that broad differences of bone structure  
30 among lifestyles can exceed, at least in some  
31 cases, individual variability. Because fossil bone  
32 cross-sections at mid-diaphysis have been  
33 produced for over a century and a half (Kolb et al.  
34 2015), a large number of mid-diaphyseal data  
35 related to extinct taxa have been acquired, and  
36 successfully exploited for palaeobiological  
37 inferences (e.g., Germain & Laurin, 2005). Fossil  
38 three-dimensional (3D) trabecular architecture has  
39 been much less investigated, as, to our  
40 knowledge, only few studies have been published,  
41 which are all focussing on primates (DeSilva &  
42 Devlin 2012; Barak et al. 2013; Su et al. 2013;  
43 Skinner et al. 2015; Su & Carlson 2017; Ryan et al.  
44 2018).

45 In general terms, it is assumed that the  
46 diaphysis of long bones tends to be exposed to  
47 mostly bending and torsion, and to a lesser extent  
48 axial compression (Carter & Beaupré 2001). On  
49 the other hand, the architecture of epiphyseal  
50 trabeculae is usually related to compressive and  
51 tensile strains (Biewener et al. 1996; Pontzer et al.  
52 2006; Barak et al. 2011). Trabecular and cortical  
53 compartments are hence expected to have distinct  
54 mechanical properties, which do not necessarily  
55 co-vary. To combine them in a single analysis, it  
56 can therefore be argued that the structural  
57 parameters deriving from these two types of  
58 structures should be considered as distinct  
59 (univariate) variables. Because trabecular and  
60 cortical structures have independently yielded a  
61 functional signal, such a combined analysis could  
62 potentially help in our endeavours to associate a  
63 bone overall structure to a loading regime, and,  
64 eventually, a function. This combined analysis has  
65 previously been achieved, on extant taxa, via  
66 different approaches. Based on epiphyseal regions  
67 of interest (ROIs) and mid-diaphyseal sections,  
68 Shaw & Ryan (2012) examined both  
69 compartments in the humerus and femur of  
70 anthropoids (see also Lazenby et al. (2008) for  
71 handedness within humans). They measured  
72 individual trabecular and mid-diaphyseal  
73 parameters, but did not combine the latter in a  
74 single test. Another approach, termed 'holistic  
75 analysis' (Gross et al. 2014), was used in *Pan* and  
76 *Homo* whole bones or epiphyses, but parameters

77 were not used conjointly to discriminate functional  
78 groups in the statistical assessment either. It is  
79 noteworthy, however, that Tsegai et al. (2017),  
80 also used this holistic analysis and performed a  
81 Principal Component Analysis (even though in that  
82 case the focus was on trabecular bone architecture  
83 and cortical bone thickness at the articular  
84 surface). Skinner et al. (2015) and Stephens et al.  
85 (2016) also used Gross et al. (2014)'s method, but  
86 focused on trabecular architecture only. This  
87 approach is particularly relevant for medium- to  
88 large-sized mammals such as *Pan* or *Homo*, for  
89 which the epiphyses include a complex trabecular  
90 architecture with distinct zones of different  
91 arrangement (such as the so-called vertical and  
92 horizontal trabecular columns in the femoral neck;  
93 Hammer 2010). One can note that an entirely  
94 different approach, not relying on the  
95 measurement of these parameters, but on micro-  
96 finite element analysis, was also applied to a  
97 primate (Huynh Nguyen et al. 2014). To our  
98 knowledge, epiphyseal trabecular and mid-  
99 diaphyseal parameters have never been combined  
100 in a functional analysis about non-primate taxa,  
101 and no analysis used both trabecular and cross-  
102 sectional parameters in the same discriminant test.

103 References to bone structure in "ground sloths",  
104 *Megatherium* in particular, date back to the 19th  
105 century (Owen 1861). But it is only fairly recently  
106 that quantification of bone structure was performed  
107 (Straehl et al. 2013; see review of Amson &  
108 Nyakatura 2017). Straehl et al. (2013) examined  
109 compactness profile of a mid-diaphyseal section in  
110 the limb long bones of various extant and extinct  
111 xenarthrans. They found that most armadillos were  
112 characterized by a humeral mid-diaphysis that is  
113 relatively more compact than that of the femur.  
114 Subsequently, Amson et al. (2017a) studied the  
115 epiphyseal trabecular architecture in extant  
116 xenarthrans, and found that some parameters, the  
117 degree of anisotropy (DA) in particular, differed  
118 among functional categories.

119 Indeed, xenarthrans are marked by distinct  
120 lifestyles that can be used to define functional  
121 categories. Extant xenarthrans were categorized  
122 by Amson et al. (2017a) as fully arboreal and non-  
123 fossorial (extant sloths), intermediate in both  
124 fossoriality and arboreality (anteaters), or fully  
125 terrestrial and fossorial (armadillos), and several  
126 fossorial classes were recognized among the  
127 latter. Partly following their expectations, Amson et  
128 al. (2017a) recovered that the armadillos (and in  
129 particular the more highly fossorial ones) differ in  
130 their greater DA for instance. The latter can be  
131 expected to be associated with the presence of  
132 one main loading direction in these highly fossorial  
133 taxa (as opposed to various equally marked

PREPRINT

134 directions in taxa for which the forelimb is arguably  
135 facing a less stereotypical main loading). Similarly,  
136 one could expect those taxa of which the long  
137 bone in question experiences one main bending  
138 direction to be characterized by a more elliptical  
139 cross-sectional shape at mid-diaphysis (CSS, see  
140 below), with the section's major axis aligned along  
141 that direction (as the major axis indicates the  
142 direction of the greatest bending rigidity; Ruff &  
143 Hayes 1983). Because no significant differences  
144 were recovered in the mid-diaphyseal global  
145 compactness between fossorial and non-fossorial  
146 talpid moles (Meier et al. 2013), it seems that a  
147 simple relation between this parameter and a  
148 loading scheme associated with fossorial activity  
149 should not be expected (see also Straehl et al.  
150 2013).

151 For extant xenarthrans, the functional  
152 categories mentioned above mostly match the  
153 phylogeny, i.e., most categories are aggregated  
154 into clades. However, this is likely not true if one  
155 includes the extinct xenarthrans, the "ground  
156 sloths" in particular, because their lifestyle was  
157 interpreted as different from that of their closest  
158 relatives, the "tree sloths". Lifestyle reconstruction  
159 of extinct xenarthrans dates back to the 18th  
160 century (see review of Amson & Nyakatura 2017).  
161 Various methods were employed to infer the  
162 lifestyle of extinct xenarthrans. So far, they all  
163 relied on bone (and tooth) gross morphology,  
164 involving approaches such as comparative  
165 functional morphology (Amson et al. 2015a),  
166 biomechanical modelling (Fariña & Blanco 1996)  
167 or muscle reconstruction (Toledo et al. 2013). This  
168 was found to be challenging, partly because of the  
169 lack of modern analogues for some taxa (Vizcaíno  
170 et al. 2017), and partly because of the  
171 autapomorphic nature of several of the xenarthran  
172 traits. This, along with the fact that functional  
173 categories mostly match phylogeny, makes  
174 disentangling the phylogenetic and functional  
175 signals difficult (Amson et al. 2017a). Bone  
176 structure was argued to be extremely plastic and  
177 found in xenarthrans in particular to be mostly  
178 devoid of phylogenetic signal (and when a  
179 significant signal is found, it is likely due to the  
180 matching between functional categories and  
181 clades; Amson et al. 2017a). The ecophenotypic  
182 nature of bone structure traits (which are defined  
183 as "biomechanically informative phenotypically  
184 plastic"; Ryan et al. 2018) is the rationale behind  
185 the present endeavour.

186 The aim of this study is to quantify bone  
187 diaphyseal and trabecular structure in "ground  
188 sloths" in order to infer their lifestyle. Given the  
189 disparate gross morphology of xenarthrans (e.g.,  
190 the humerus is extremely slender in extant sloths

191 and particularly stout in most armadillos, see  
192 Mielke et al. 2018a), we believe that studying  
193 easily comparable and arguably ecophenotypic  
194 traits such as bone structure parameters is highly  
195 relevant for this purpose. Extant sloths represent  
196 but a remnant of the overall diversity of Tardigrada  
197 (also termed Folivora or Phyllophaga; Delsuc et al.  
198 2001), and the two extant genera, *Bradypus*  
199 (three-toed sloths) and *Choloepus* (two-toed  
200 sloths), most likely acquired their highly derived  
201 lifestyle convergently (Nyakatura 2012; Coutier et  
202 al. 2017). Most aspects of the biology of "ground  
203 sloths" exceed in disparity those of their extant kin.  
204 They were found from Alaska (Stock 1942) to  
205 southernmost South America (and potentially  
206 Antarctica; Carlini et al. 1990; Gelfo et al. 2015)  
207 Various feeding habits, such as bulk-feeding or  
208 selective-feeding are purported (Bargo & Vizcaino  
209 2008). The lifestyle of most extinct sloths is  
210 reconstructed as terrestrial (but see *Thalassocnus*  
211 for an (semi-)aquatic lineage; Amson et al. 2015b).  
212 Furthermore, some "ground sloths" contrast with  
213 their extant relatives in reaching large body sizes  
214 (up to several tones; Fariña et al. 1998).

215 The fossil record of early (Palaeocene-Eocene)  
216 xenarthrans and especially that of sloths, is rather  
217 poor (Gaudin & Croft 2015). It is therefore hard to  
218 reconstruct the ancestral lifestyle of Tardigrada,  
219 and more generally Xenarthra. To date, no extinct  
220 sloths have been reconstructed to have had a  
221 suspensory posture and locomotion resembling  
222 their extant kin (Pujos et al. 2012). But, because  
223 their gross anatomy was considered as similar to  
224 that of extant anteaters, Matthew (1912) argued  
225 that *Hapalops*, for instance, was partly arboreal.  
226 Such a lifestyle was of course not considered for  
227 larger taxa (but see translation of Lund in Owen  
228 (1839) for an early opposite view). However,  
229 digging capabilities, as well as bipedal stance  
230 and/or locomotion, was proposed for several  
231 medium-sized (e.g., *Glossotherium*) to giant-sized  
232 (e.g., *Megatherium*) "ground sloths" (Bargo et al.  
233 2000; Patiño & Fariña 2017). For the present  
234 analysis, we were able to sample small-sized as  
235 well as large-sized "ground sloths." The estimated  
236 body sizes of the latter exceed that of extant  
237 xenarthrans by two orders of magnitude (see  
238 below for body mass estimates). Because this has  
239 already been pointed out as a challenge for the  
240 reconstruction of extinct xenarthrans' lifestyles  
241 (Vizcaíno et al. 2017), and because size might be  
242 correlated to at least some bone structure  
243 parameters, potential challenges inherent to the  
244 taxa and parameters we studied will be discussed.

245

## PREPRINT

## 246 MATERIAL AND METHODS

### 247 Specimen and scanning procedure

248 The dataset of Amson et al. (2017a), which  
249 consists of extant skeletally mature wild-caught  
250 xenarthrans, was extended by several extinct  
251 sloths roughly spanning the whole body size range  
252 of the group: the small-sized (ca. 38 kg; Bargo et  
253 al. 2012) *Hapalops* sp. (Santa Cruz Formation,  
254 Early Miocene, ca. 17 Ma; Perkins et al. 2012), the  
255 medium-sized (ca. 200 kg; Smith et al. 2003)  
256 *Valgipes bucklandi* (Lagoa Santa, Brazil,  
257 Pleistocene; the sampled specimen  
258 MNHN.F.BRD29 is labelled *Ocnopus gracilis*,  
259 which is now viewed as a junior synonym; Cartelle  
260 et al. 2009), *Scelidotherium leptocephalum* (ca.  
261 1000 kg; Vizcaíno et al. 2006) and *Glossotherium*  
262 *robustum* [ca. 1200 kg (Vizcaíno et al. 2006); both  
263 from 'Pampean', Argentina and Tarija, Bolivia, both  
264 Pleistocene], as well as the large-sized *Lestodon*  
265 *armatus* [ca. 3200 kg (Vizcaíno et al. 2006);  
266 'Pampean', Argentina, Pleistocene] and  
267 *Megatherium americanum* [ca. 4000 kg (Fariña et  
268 al. 1998); 'Pampean', Argentina, Pleistocene]. The  
269 sampled specimens are skeletally mature (a few  
270 specimens showed a remnant of epiphyseal line,  
271 see below) and did not present apparent bone  
272 diseases (which were also criteria of selection for  
273 the extant species, see Amson et al. 2017a). All  
274 fossils were scanned (micro computed  
275 tomography,  $\mu$ CT) using a v|tome|x 240 L system  
276 (GE Sensing & Inspection Technologies Phoenix  
277 X|ray) at the AST-RX platform of the Museum  
278 national d'Histoire naturelle (Paris, France).  
279 According to the methodology and results of  
280 Amson et al. (2017a), we focused our data  
281 acquisition of the trabecular parameters on the  
282 humeral head and radial trochlea regions of  
283 interest (ROIs; see below). Mid-diaphyseal  
284 parameters were acquired for these two bones and  
285 for the third metacarpal (Mc III) in all species, when  
286 available. See Table 1 for the list of skeletal  
287 elements sampled for each extinct species, along  
288 with ROIs for which data were successfully  
289 acquired [see also Amson et al. (2017a), for  
290 sample size and scanning procedure of the extant  
291 species specimens]. For the included specimens,  
292 scanning resolution ranged from 0.03 to 0.123 mm  
293 (depending on the size of the specimens). Relative  
294 resolution, used to assess if the employed  
295 resolution is adequate to analyse trabecular bone  
296 (mean trabecular thickness divided by resolution)  
297 ranged from 5.1 to 11.5 pixels/trabecula. This is  
298 considered as appropriate (Sode et al. 2008; Kivell  
299 et al. 2011; Mielke et al. 2018b). Scanning  
300 resolution (and relative resolution for the trabecular  
301 ROIs) for each specimen can be found in

302 Supplementary Online Material (SOM) 1. For this  
303 first endeavour of palaeobiological reconstruction  
304 of "ground sloths" lifestyle based on bone  
305 diaphyseal and trabecular structure, we compared  
306 the parameters yielded by the fossils to those of  
307 the extant specimens, using the same lifestyle  
308 categories as defined by Amson et al. (2017a), i.e.,  
309 the fully arboreal extant sloths, intermediate  
310 anteaters, and fully terrestrial and fossorial  
311 armadillos.

312

### 313 Qualitative observation of the 314 diaphyseal structure

315 Raw image stacks were visualized with the Fiji  
316 package (ImageJ v. 1.51n and plugins; Schindelin  
317 et al. 2012, 2015; Schneider et al. 2012). The  
318 'Orthogonal Views' routine was used to compute  
319 longitudinal sections. Sedimentary matrix  
320 prevented satisfying segmentation for some  
321 specimens but at least some qualitative  
322 observations were possible for all specimens (see  
323 Table 1).

### 324 Trabecular parameters

325 We followed the methodology of Amson et al.  
326 (2017a), which involves the use of the BoneJ  
327 plugin (Doube et al. 2010) for Fiji. In brief, bones  
328 were first placed in the same standard orientation.  
329 Then, ROIs were selected in the centre of the  
330 studied epiphyses, with the 'Fit Sphere' routine of  
331 BoneJ (see Amson et al. 2017a: fig. 2 and  
332 Additional files 3, 4). ROI were selected to be as  
333 large as possible but without including cortical  
334 bone. We used the 'Orthogonal Views' routine of  
335 Fiji to ascertain that the centre of the ROI was  
336 precisely located at the centre to the studied  
337 epiphysis along the mediolateral, anteroposterior,  
338 and proximodistal directions. The resulting  
339 substack was then thresholded ('Optimise  
340 Threshold> Threshold Only' routine) and purified  
341 ('Purify' routine). Finally, trabecular parameters  
342 were measured. Given the results of Amson et al.  
343 (2017a), we focused on the degree of anisotropy  
344 (DA), main direction of the trabeculae (MDT), bone  
345 volume fraction, BV/TV, connectivity density  
346 (Conn.D), trabecular mean thickness (Tb.Th),  
347 trabecular mean spacing (Tb.Sp), bone surface  
348 area (BS). Other trabecular parameters routinely  
349 acquired, however, can also be found in SOM 1.

350 For some specimens, the lack of contrast  
351 between bone and the sedimentary matrix  
352 prevented accurate bone segmentation (see Table  
353 1). Thresholding (see above) was successfully  
354 performed for the rest of the specimens; some of  
355 the latter, however, required manual removal of a

## PREPRINT

356 few sedimentary particles (using the un-  
357 thresholded stack to recognize them).

358 The humerus of two specimens of *Hapalops*  
359 showed a slight remnant of epiphyseal line. A  
360 smaller ROI was hence defined to exclude this line  
361 (which would have biased the measurements) by  
362 cropping isometrically (in 3D) the substack (custom  
363 ImageJ script, SOM 2). The cropping coefficient  
364 (MNHN.F.SCZ162: 39%; MNHN.F.SCZ164: 72%)  
365 was then applied to the whole dataset and  
366 trabecular parameters were acquired anew. The  
367 means of the latter were compared to the initial  
368 parameters. For the dataset cropped at 72%,  
369 differences were found as minor (similar MDT;  
370  $\Delta DA = 3\%$ ;  $\Delta BV/TV < 1\%$ ;  $\Delta ConnD < 1\%$ ), while for  
371 the dataset cropped at 39%, differences were  
372 more important (MDT of opposing direction;  $\Delta DA$ ,  
373 13%;  $\Delta BV/TV = 2\%$ ;  $\Delta ConnD$ , 4%). Because it was  
374 exceeding a difference of 5% for at least one  
375 parameter value, we did not analyse further the  
376 latter dataset (and excluded MNHN.F.SCZ162  
377 from the analysis of trabecular architecture). A  
378 remnant of epiphyseal line was also observed in  
379 *Glossotherium robustum* MNHN.F.PAM756, but in  
380 its case only qualitative observations were made.

381

### 382 Mid-diaphyseal parameters

383 The same standardly oriented  $\mu$ CT-scan stacks  
384 (see above) were used for the acquisition of mid-  
385 diaphyseal parameters. Using Fiji, a cross-section  
386 was selected at mid-diaphysis; the latter was  
387 defined as the midpoint between most proximal  
388 and most distal points of either articular surfaces.  
389 Several sampled fossils did not preserve the mid-  
390 diaphysis. To compare them to the rest of the  
391 specimens, the latter were re-sampled at the level  
392 closest to mid-diaphysis preserved by each of  
393 those fossils (as assessed by superimposition with  
394 a complete specimen of the same species;  
395 MNHN.F.CSZ164 (humerus): 35% from proximal  
396 end; MNHN.F.CSZ166 (radius): 72% from the  
397 proximal end; see Table 1). Once the diaphyseal  
398 cross-sections were selected, they were  
399 thresholded automatically (see above), but we  
400 manually checked the resulting image, which, in a  
401 few instances, required a manual correction of the  
402 levels. The whole sectional area (WArea), global  
403 compactness (GC; both acquired with a custom  
404 ImageJ script, SOM 3), and cross-sectional  
405 parameters of the 'Slice Geometry' routine of  
406 BoneJ (Doube et al. 2010) were acquired. For the  
407 following analyses, we focused on cross-sectional  
408 area (CSA) and the ratio of second moment of  
409 area around major to minor axes ( $I_{max}/I_{min}$ ), also  
410 termed cross-sectional shape (CSS). If the ratio is  
411 close to one, CSS will usually be roughly circular.

412 Values above one will entail increasingly elliptical  
413 shapes. The other diaphyseal parameters,  
414 however, can also be found in SOM 1. Because, if  
415 normalized with WArea (see below), CSA would be  
416 redundant with GC, it will only be used as a  
417 potential body size proxy.

418

### 419 Statistics

420 The statistical analysis was performed using R  
421 version 3.4.3. Amson et al. (2017a) accounted for  
422 size effects by computing a phylogenetically  
423 informed linear regression for each parameter,  
424 against a size proxy. If the regression was found  
425 as significant, its residuals were used as the 'size-  
426 corrected' parameter. But the size of "ground  
427 sloths", well exceeding for most of them that of  
428 extant xenarthrans, could bias such a procedure.  
429 Indeed, the slightest error on the regression  
430 coefficients estimation would likely involve  
431 drastically different residuals for those outlying  
432 taxa (see also Discussion). We therefore favoured,  
433 for the present analysis, to normalize those  
434 parameters that have a dimension by dividing the  
435 trait value by a body size proxy (raised to the same  
436 dimension). As body size proxies, we considered  
437 the specimen-specific TV (for trabecular  
438 parameters) and WArea (mid-diaphyseal  
439 parameters) or body mass (BM; species averages,  
440 because unknown for most collection specimens).  
441 Species body masses were taken from the AnAge  
442 database (Tacutu et al. 2013) and additional  
443 sources when necessary (Vizcaíno et al. 1999;  
444 Hayssen 2010; Abba & Superina 2016; Smith &  
445 Owen 2017) for the extant species and from the  
446 specific sources mentioned above for the extinct  
447 taxa. The coefficient of determination of  
448 regressions against a parameter well known to  
449 correlate with size (Tb.Th for trabecular  
450 parameters and CSA for mid-diaphyseal  
451 parameters) indicated that BM was more  
452 representative of the sample variance for the  
453 trabecular parameters, while it was WArea in the  
454 case of mid-diaphyseal parameters. They were  
455 accordingly used as body size proxies in the  
456 subsequent analyses.

457 Besides univariate comparisons, we performed  
458 linear discriminant analyses to infer the most likely  
459 lifestyle of extinct species. Both trabecular and  
460 mid-diaphyseal parameters of the humerus and  
461 radius were conjointly used in these analyses  
462 (parameters from the Mc III were not included  
463 because of their lack of discrimination power, see  
464 Results). To account for the great body size  
465 disparity of the studied taxa, it is the 'size-  
466 normalized' parameters that were used (raw value  
467 divided by the relevant body size proxy if

## PREPRINT

468 parameter not dimensionless, see above). One  
469 analysis per extinct taxon was performed, because  
470 we were not able to acquire all parameters for  
471 each of them (depending on the successfully  
472 processed skeletal elements and ROIs, see Table  
473 1). To phylogenetically inform these analyses, we  
474 used the function pFDA (Motani & Schmitz 2011;  
475 latest version available on  
476 [github.com/lSchmitz/phylo.fda](https://github.com/lSchmitz/phylo.fda)). This 'phylogenetic  
477 flexible discriminant analysis' uses the optimised  
478 value of Pagel's Lambda to account for the  
479 phylogenetic signal (Pagel 1999). As implemented  
480 here, the latter can span from 0 to 1, respectively  
481 denoting absence of phylogenetic signal and trait  
482 evolution consistent with a Brownian motion model  
483 of evolution. The rest of the pFDA works as a  
484 'traditional' discriminant analysis. The training data,  
485 stemming in our case from the extant xenarthrans,  
486 were classified according to the three main  
487 lifestyles, i.e., 'armadillo', 'anteater', and 'extant  
488 sloth'. The test data relates to the sampled extinct  
489 sloths. If not already normally distributed (as  
490 indicated by a Shapiro test), the parameters were  
491 log-transformed (and Shapiro tests were run again  
492 to confirm normality). Collinear variables (highly  
493 correlated variables as indicated by a correlation  
494 above 0.9) were excluded.

495 The timetree used to phylogenetically inform  
496 the tests was based on that used by Amson et al  
497 (2017a) (which is based on Gibb et al. 2016), and  
498 was completed with the extinct taxa. The  
499 relationships between the main clades follow  
500 Amson et al. (2017b). The split between  
501 Mylodontidae (represented by *Lestodon*) and the  
502 other Eutardigrada (all sloths but *Bradypus*) was  
503 set according to the age of the oldest fossil  
504 pertaining to the clade (*Octodontotherium*, ca. 29  
505 Ma; Flynn & Swisher 1995; Kay et al., 1998) and is  
506 thus conservative (Fig. 1). But one can note that  
507 this age is roughly as old or older than the recent  
508 molecular estimations of the divergence time  
509 between the two genera of extant sloths (Slater et  
510 al. 2016; Delsuc et al. 2018). The age of  
511 divergence between *Lestodon* and *Glossotherium*  
512 was set according to the age of *Thinobadistes*  
513 (Hemphillian, ca. 9 Ma; Woodburne 2010), which is  
514 more closely related to *Lestodon* than  
515 *Glossotherium* according to Gaudin (2004). Extinct  
516 sloths were placed according to their known  
517 geological ages (see above; for Pleistocene taxa, a  
518 relatively young age of 0.1 Ma was arbitrarily  
519 given. Length of the branches leading to nodes of  
520 unknown ages, which are in direct relation to  
521 extinct taxa, and from these to terminal extinct  
522 taxa, were arbitrarily set to 1 and 0.1 Ma,  
523 respectively. Caution should be taken regarding  
524 the phylogenetic scheme used herein, because  
525 recent developments (yet to be published) in

526 phylogenetic analyses of xenarthrans, which  
527 involve ancient DNA, might imply significant  
528 alterations of our understanding of sloths'  
529 systematics (R.D.E. MacPhee, pers. comm.,  
530 2018).

531

532 Institutional abbreviations

533 **MCL**, Museu de Ciências Naturais da Pontifícia  
534 Universidade Católica de Minas Gerais, Belo  
535 Horizonte, Brazil; **MNHN.F**, Muséum national  
536 d'Histoire naturelle, Paris, France, Palaeontology  
537 collection; **ZMB\_MAM**, Museum für Naturkunde  
538 Berlin (Germany), Mammals Collection; **ZSM**;  
539 Zoologische Staatssammlung München, Germany.

## 540 RESULTS

### 541 Qualitative observations of diaphyseal 542 structure

543 In the humerus of small armadillos and  
544 anteaters, the medullary cavity is mostly devoid of  
545 spongy bone (with just a few isolated trabeculae,  
546 e.g., *Chaetophractus vellerosus* ZSM-1926-24,  
547 Fig. 2A; *Cyclopes didactylus*, ZMB\_MAM\_3913). In  
548 larger members of these clades, the medullary  
549 cavity is filled throughout the proximodistal length  
550 of the diaphysis by a more or less dense  
551 spongiosa (e.g., *Priodontes maximus* ZSM-1931-  
552 293; *Myrmecophaga tridactyla*,  
553 ZMB\_MAM\_102642; Fig. 2B-C). In extant sloths, a  
554 spongiosa can be observed in most of the  
555 diaphysis (*Bradypus*; n=4) or throughout its length  
556 (*Choloepus*, Fig. 2E; n=4), but a central region free  
557 of trabeculae subsists. The medullary cavity of the  
558 whole diaphysis is full of spongy bone in  
559 *Glossotherium* (n=1; Fig. 2F). It is nearly full in  
560 *Scelidotherium*, with just a small central free region  
561 subsisting (n=1). For *Hapalops*, a clear  
562 assessment cannot be given due to the  
563 preservation of the specimens at hand  
564 (MNHN.F.SCZ162 seems to show a free medullary  
565 cavity, but MNHN.F.SCZ164, which only preserves  
566 the proximal third of bone, shows a medullary  
567 cavity full of spongy bone). The whole diaphysis of  
568 the larger sloths *Megatherium* and *Lestodon* were  
569 not observed, but it is noteworthy that their  
570 epiphyses are filled with dense spongiosa (each  
571 n=1).

572 The radius of extant xenarthrans shows the  
573 same pattern as the humerus. In *Glossotherium*,  
574 *Lestodon*, and *Megatherium*, the medullary cavity  
575 of the whole radial diaphysis is essentially full of  
576 spongy bone (Fig. 2G; no data for *Hapalops* for  
577 which the entire radial epiphysis could not have  
578 been sampled).

## PREPRINT

579

### 580 Univariate comparisons

581 The structure of the Mc III of extant species did  
582 not differ notably among the lifestyle categories  
583 (Fig. 3A-B; Table 2). There is only a tendency for  
584 the anteaters and armadillos to have a more  
585 compact mid-diaphysis (Fig. 3A). Mc III structure  
586 was therefore not further studied, and not included  
587 in the discriminant analyses (see below). One can  
588 note, however, that some armadillos have an  
589 outlyingly high CSS (i.e., very elliptic cross-section)  
590 at mid-diaphysis (Fig. 3B; the single most elliptic  
591 value is found in the subterranean *Calyptophractus*  
592 *retusus* ZSM-1961-316). A great disparity of CSS  
593 at this location is found in extinct sloths, with the  
594 value of *Valgipes* falling among the outlying  
595 armadillos just mentioned, and that of  
596 *Megatherium* being the single lowest (i.e., most  
597 circular cross-section).

598 The humeral diaphysis in *Hapalops* is  
599 remarkably compact. At mid-diaphysis (n=1), it  
600 features the highest GC value of the whole dataset  
601 (Fig. 3C; Table 2). At 35% of the diaphyseal length  
602 (from the proximal end, level which was sampled  
603 to include fragmentary fossils, see Material and  
604 Methods; n=2), *Hapalops* falls in the uppermost  
605 distribution of the extant sloths, which does not  
606 markedly differ from that of armadillos or anteaters.  
607 The CSS at humeral mid-diaphysis distinguishes  
608 quite clearly the functional categories, with high  
609 values (i.e., elliptical cross-sections) in armadillos,  
610 intermediate values in anteaters, and low values  
611 (i.e., round cross-sections) in extant sloths. In  
612 *Hapalops*, this parameter falls among the  
613 particularly tight range of extant sloths (Fig. 3D),  
614 but among that of anteaters at 35% of the  
615 diaphyseal length. In *Scelidotherium* (n=1), the GC  
616 of the humerus at mid-diaphysis is higher than that  
617 of most extant xenarthrans, falling in the upper  
618 distribution of armadillos and extant sloths (Fig.  
619 3C). One should note, however, that this  
620 parameter does not yield any clear distinction  
621 among lifestyles. The humeral CSS at mid-  
622 diaphysis of *Scelidotherium*, on the other hand,  
623 falls among anteaters (Fig. 3D).

624 There is a clear tendency for the radial  
625 diaphysis GC to be higher in armadillos,  
626 intermediate in anteaters, and lower in extant  
627 sloths. *Hapalops* (n=1; sampled at 72% of  
628 diaphyseal length) falls among the distribution of  
629 armadillos, being slightly higher than extant sloths'  
630 values (Table 2). The GC of *Glossotherium* and  
631 *Lestodon* at radial mid-diaphysis is very low, which  
632 agrees with the tendency observed in extant sloths  
633 (Fig. 3E). The CSS at that location is found as  
634 rather homogeneously low among extant

635 xenarthrans, except for two armadillos with  
636 outlying high values. *Glossotherium* and *Lestodon*  
637 fall beyond the distribution of most extant  
638 xenarthrans, their CSS being only tied or exceeded  
639 by the two outlying armadillos (Fig. 3F).

640 Regarding the trabecular architecture  
641 parameters, only the degree of anisotropy (DA) will  
642 be presented with univariate comparisons, as it  
643 was singled out as the most functionally  
644 informative of these parameters in extant  
645 xenarthrans (Amson et al. 2017a). But mean  
646 values of other trabecular parameters of interest  
647 are also presented in Table 3. For the humeral  
648 head, using a ROI representing 72% of the  
649 maximum volume (see Material and Methods  
650 section), armadillos are distinguished from other  
651 extant xenarthrans by their high values (i.e. more  
652 anisotropic architecture). Both *Hapalops* and  
653 *Lestodon* (n=1 in each case) fall in the upper  
654 distribution (i.e., more anisotropic) of extant sloths  
655 and anteaters (Fig. 4A). The same pattern is found  
656 for the full ROI in *Lestodon* (no data for *Hapalops*,  
657 see Material and Methods section). In the distal  
658 radius (trochlea), the trabecular architecture of  
659 armadillos is again found as more anisotropic than  
660 in the other extant categories. Moreover, the main  
661 distribution of extant sloths is found as clustering at  
662 the level of the lower values of anteaters. The DA  
663 value of *Hapalops* falls above the main distribution  
664 of extant sloths, within that of anteaters (Fig. 4B).  
665 *Glossotherium* is the sampled taxon with the single  
666 lowest DA value (most isotropic structure). One  
667 should note, however, that DA was significantly  
668 correlated to body size (see Discussion). The main  
669 direction of the trabeculae (MDT) in the radial  
670 trochlea (humeral head did not yield lifestyle  
671 discrimination; Amson et al. 2017b) of both  
672 *Hapalops* and *Glossotherium* falls outside the  
673 distribution of extant xenarthrans (Fig. 4C). In both  
674 cases, the MDT falls closer to the distribution of  
675 extant sloths.

676

### 677 Phylogenetically flexible discriminant 678 analyses

679 Each studied "ground sloth" was subject to an  
680 independent analysis (see Material and Methods),  
681 to predict the most probable lifestyle among the  
682 three broad lifestyle categories represented by  
683 armadillos, anteaters, and extant sloths,  
684 respectively. The results regarding classification of  
685 each "ground sloth" are given in Table 4, and the  
686 corresponding outcomes of the training data  
687 (posterior probability of the classification of the  
688 extant species according to each discriminant  
689 analysis) are given in SOM 4. We also provide the  
690 canonical coefficients (weights) of each

## PREPRINT

691 explanatory variable for each analysis in SOM 5.  
692 For *Hapalops*, 18 parameters could be initially  
693 included in the analysis (diaphyseal and trabecular  
694 parameters, from both the humerus and radius).  
695 Due to high correlation among some variables  
696 (Conn.D between two ROIs; between Tb.Th and  
697 Tb.Sp of both ROIs; between BS and BV of the  
698 radial trochlea ROI), four variables were excluded  
699 (see list of included variables in SOM 5. The  
700 recovered optimal Lambda is 0 (no significant  
701 correlation of the trait values with phylogeny) and  
702 the discrimination is optimal (training  
703 misclassification error of 0%). *Hapalops* is  
704 classified in the category of extant sloths' lifestyle  
705 with a high posterior probability (>99%). Indeed, it  
706 falls close to extant sloths' distribution along the  
707 Discriminant Axis (pDA) 1 (Fig. 5A). However,  
708 *Hapalops* clearly falls beyond the distribution of  
709 extant xenarthrans along pDA2. The parameter  
710 contributing the most to the discrimination is the  
711 DA (that of the radial trochlea for pDA1 and that of  
712 the humeral head for pDA2; see SOM 5).

713 For *Lestodon*, eight parameters could be  
714 included (from the radial diaphysis and humeral  
715 head trabeculae), of which one was excluded  
716 because of collinearity (present between Tb.Th  
717 and Tb.Sp). The recovered optimal Lambda is  
718 0.84, and training misclassification error is 50%. It  
719 is classified in the armadillos' lifestyle category  
720 with a rather low posterior probability (64%), the  
721 second most probable classification being to  
722 anteaters (35%). According to this analysis, a  
723 classification in extant sloth's category is very  
724 improbable (0.006%). *Lestodon* falls beyond the  
725 distribution of extant xenarthrans (Fig. 5B). The  
726 parameter contributing the most to the  
727 discrimination is the 'size-normalized' Tb.Th (for  
728 both pDA1 and pDA2).

729 For *Glossotherium*, eight parameters could be  
730 included (from the radial diaphysis and trabeculae  
731 of the radial trochlea). The recovered optimal  
732 Lambda is 0.88, and training misclassification error  
733 is 35%. The most probable classification is to  
734 anteaters (50%), followed by the equally probable  
735 classifications to armadillos or extant sloths (each  
736 25%). *Glossotherium* falls within the distribution of  
737 extant xenarthrans, but outside the distribution of  
738 each lifestyle class, just outside that of anteaters  
739 (Fig. 5C). The parameters contributing the most to  
740 the discrimination are the DA (pDA1) and 'size-  
741 normalized' BS (pDA2).

742 For *Scelidotherium*, only two parameters could  
743 be included (from the humeral diaphysis). An  
744 optimal Lambda of 0.96 and a high training  
745 misclassification error of 69% were recovered. The  
746 three possible classifications are roughly equally  
747 probable (anteater: 37%; extant sloth: 36%;

748 armadillo: 27%). *Scelidotherium* basically falls in  
749 the middle of the distribution of extant xenarthrans  
750 (Fig. 5D). The parameter contributing the most to  
751 the discrimination is CSS (for both pDA1 and  
752 pDA2).

753

## 754 DISCUSSION

755 On the whole, the classification of extinct sloths  
756 to one of the extant xenarthran lifestyles (that of  
757 armadillos, anteaters, or extant sloths) based on  
758 forelimb bone structure proved to be challenging.  
759 This appears to be due to at least three obvious  
760 causes: (1) the imperfect lifestyle discrimination  
761 based on diaphyseal and trabecular parameters,  
762 (2) the difficulties raised by the size correction (for  
763 some parameters), and (3) the fact that the values  
764 of extinct taxa are outliers with respect to the  
765 distribution of extant xenarthrans (for some  
766 parameters).

767 The four discriminant analyses we performed  
768 vary greatly in the number of included parameters.  
769 As expected, analyses including more parameters  
770 yielded a better discrimination, i.e., a lower  
771 misclassification error. The lowest misclassification  
772 error (0%) was obtained for the analysis of  
773 *Hapalops*, for which it was possible to include 14  
774 parameters (18 before exclusion of collinear  
775 parameters) from both the diaphysis and  
776 epiphyseal trabeculae. The worst discrimination  
777 (69% of misclassification error) was found for the  
778 analysis of *Scelidotherium*, for which only two  
779 parameters, from the humeral diaphysis, could  
780 have been included. This lends support to the  
781 approach of combining parameters from several  
782 bone compartments, if one endeavours to  
783 discriminate lifestyles based on these parameters.

784 Several of the investigated parameters were  
785 significantly correlated with body size. To attempt  
786 to prevent the size of the studied taxa from  
787 influencing the analysis, a common approach is to  
788 size-correct the raw data using the residuals of a  
789 regression of the trait against a body size proxy  
790 (Mccoy et al. 2006). This proved to be challenging  
791 for extinct sloths, because, for most of them, body  
792 size largely exceeds that of extant xenarthrans  
793 (Vizcaino et al. 2017). This potentially makes the  
794 size regressions spurious, as the extreme values  
795 over-influence the regression coefficients. This is  
796 not a trivial consideration for our dataset. For  
797 instance, if one would size-correct the DA in the  
798 radial trochlea using the residuals of the  
799 corresponding size regression, the medium-sized  
800 extinct sloth *Glossotherium*, of which the raw DA  
801 value was found as the lowest of the dataset,



PREPRINT

802 would fall in the middle of the overall distribution.  
803 For those parameters that are dimensionless, we  
804 hence decided to use the untransformed data. But  
805 this is likely to be biased as well, due the potential  
806 presence of allometry. For instance, the scaling  
807 exponent of the degree of anisotropy (DA) across  
808 primates in the humeral and femoral head was  
809 found by Ryan & Shaw (2013) to be significantly  
810 negative (but close to 0, which would have  
811 denoted isometry). We also found a negative  
812 scaling exponent for one of the investigated ROI,  
813 the radial trochlea. It would be suboptimal to  
814 exclude this parameter, especially because it was  
815 found as the best functionally discriminating  
816 parameter in extant xenarthrans (Amson et al.  
817 2017a). It was also singled out as reflecting joint  
818 loading in primates better than other parameters  
819 (Tsegai et al. 2018), and, more generally, DA was  
820 found as functionally informative in several  
821 analyses about that clade (e.g. Ryan & Ketcham  
822 2002; Griffin et al. 2010; Barak et al. 2013; Su et  
823 al. 2013; Georgiou et al. 2018; Ryan et al. 2018;  
824 Tsegai et al. 2018). A tendency for a more  
825 anisotropic structure in the femoral head of  
826 arboreal squirrels was also demonstrated (Mielke  
827 et al. 2018b). A way to improve accuracy of the  
828 size-correction using residuals of a regression  
829 against a body size proxy would be, in our case, to  
830 include to the sampling xenarthrans that have a  
831 body size between that of extant species and that  
832 of the giant “ground sloths”, i.e., with a mass  
833 roughly between 50 kg and 300 kg. Unfortunately,  
834 the number of known xenarthrans of this size  
835 range is very limited.

836 It was already obvious from univariate  
837 comparisons that the bone structure in *Hapalops*,  
838 the small-sized extinct sloth, departed from the  
839 condition observed in extant xenarthrans. Indeed,  
840 the overall great compactness of its humeral  
841 diaphysis does not seem to be matched by any  
842 other sampled xenarthran (but see aquatic  
843 specialization of *Thalassocnus*; Amson et al.  
844 2014). This does not seem to be a systemic bone  
845 mass increase (Amson et al. 2018), because  
846 neither the trabecular parameters nor the  
847 compactness of the radial diaphysis of this taxon  
848 seem to be notably affected by bone mass  
849 increase. Finding a compact humerus is  
850 particularly surprising, as the stylopod can be  
851 expected to be less compact than the zeugopod in  
852 terrestrial mammals (Amson & Kolb 2016). In the  
853 case of *Lestodon*, it was not obvious from  
854 univariate comparisons that its bone structure was  
855 outlying, but both the latter and *Hapalops* fell  
856 outside the range of extant xenarthrans in the  
857 respective discriminant analyses. One may hence  
858 conclude that, based on their bone structure, the  
859 humerus and radius of both *Hapalops* and

860 *Lestodon* were likely involved in a loading regime  
861 different from those associated with the lifestyles of  
862 extant xenarthrans. For *Hapalops*, one can  
863 however note that the phylogenetically informed  
864 discriminant analysis strongly supports a  
865 classification within extant sloths' category, which  
866 might indicate that some aspects of their  
867 mechanical environment were similar. The main  
868 direction of the trabecular (MDT) also agrees with  
869 the fact that the bone structure of extant sloths is  
870 different from that of *Hapalops*, but that the former  
871 represent the most similar of the three extant  
872 lifestyles discriminated here (Fig. 4C). Based on  
873 bone gross morphology, *Hapalops* was previously  
874 reconstructed as partly or primarily arboreal  
875 (Matthew 1912; White 1997). Both bone structure  
876 and gross morphology therefore seem to point in  
877 the same direction for the reconstruction of  
878 *Hapalops*' lifestyle. The large-sized *Lestodon*, on  
879 the other hand, is not classified with strong support  
880 to one of the extant groups. The least probable  
881 classification is to extant sloths' lifestyle (0.03% of  
882 posterior probability), which might suggest that the  
883 bone structure of *Lestodon* resembles more that of  
884 anteaters and armadillos. Naturally, suspensory  
885 posture has never been purported for this  
886 elephant-sized sloth. *Lestodon* was interpreted as  
887 traviportal (slow-moving with both quadrupedal and  
888 bipedal stances) by Toledo (1996), and the  
889 forelimb gross morphology was found to be  
890 consistent with fossorial activity (but probably not  
891 to procure food (Coombs 1983); see Bargo et al.  
892 (2000) for a more tempered interpretation).  
893 Including other fossorial and non-fossorial taxa in  
894 the sampling of the bone structure analysis will be  
895 necessary to suggest a more precise assertion  
896 regarding the digging habits of this taxon (but its  
897 large size might be problematic, see above). The  
898 two other extinct sloths subject to a discriminant  
899 analysis, *Glossotherium* and *Scelidothorium*, differ  
900 from the former two in falling within the distribution  
901 of extant xenarthrans. However, in neither case is  
902 the classification clear, and it seems that acquiring  
903 additional bone structure parameters will be  
904 necessary to draw reliable conclusions.

905 The Mc III did not yield clear discrimination  
906 among the extant lifestyles and was hence not  
907 included in the discriminant analyses. But one can  
908 note that an interesting pattern was observed in  
909 the cross-sectional shape (CSS) of extinct sloths at  
910 mid-diaphysis. Indeed, high values, denoting  
911 elliptic sections, are found in *Valgipes* and  
912 *Glossotherium*. Such a bone structure is expected  
913 to be suited to resist bending along its major axis  
914 (Ruff & Hayes 1983). This is consistent with  
915 previous lifestyle reconstruction of *Glossotherium*,  
916 which is argued to have had fossorial habits  
917 (Coombs 1983; Bargo et al. 2000) supposedly

## PREPRINT

918 entailing a well-marked main direction of bending.  
919 Furthermore, it might suggest that *Valgipes* had  
920 similar habits, which, to our knowledge, was never  
921 purported.

922 A medulla filled with spongy bone was  
923 observed in large-sized mammals, and argued to  
924 be a potential adaptation to graviportality  
925 (Houssaye et al. 2015). It does not seem to be  
926 possible to easily draw such a conclusion for  
927 xenarthrans: whatever their lifestyle, xenarthrans  
928 with a mass of roughly 5 kg (e.g., *Tamandua*) and  
929 over tend to fill their medullary cavity with spongy  
930 bone. This is true for the forelimb, as described  
931 here (and as also reported by Houssaye et al.  
932 (2015) for the humerus), but likely also for the hind  
933 limb: a 'naturally sectioned' tibia of the small-sized  
934 *Nothrotherium* (less than ca. 100 kg; Amson et al.  
935 2016) reveals that the medullary cavity is entirely  
936 filled with dense spongy bone (Fig. 2D). In the  
937 case of xenarthrans, the great quantity of  
938 diaphyseal trabeculae might be related to another  
939 aspect affecting bone structure, such as mineral  
940 homeostasis and/or metabolism (Eleazer &  
941 Jankauskas 2016; and references therein). While  
942 more experimental data is required to discuss it  
943 beyond speculation, it was reported that extant  
944 sloths (at least the two-toed sloth *Choloepus*) are  
945 prone to soft tissue mineralization likely due to  
946 mineral imbalance (Han & Garner 2016). One can  
947 therefore speculate that the observed great  
948 quantity of diaphyseal trabeculae might be a  
949 storage mechanism for mineral in excess.

950 The extremely low metabolism of extant sloths  
951 was suggested by Montañez-Rivera et al. (2018)  
952 as a potential explaining factor for their low cortical  
953 compactness (CC). Indeed, they found that extant  
954 sloths depart in that regard from other extant  
955 xenarthrans as well as from two extinct sloths (the  
956 small-sized *Hapalops* and *Parocnus*). No  
957 quantitative assessment of CC was performed  
958 here. But we can report that, at mid-diaphysis, the  
959 CC of the sampled extinct sloths was generally  
960 observed as low (when an observation was  
961 possible), similar to armadillos and anteaters.  
962 Nevertheless, two specimens showed a rather  
963 porous cortex, *Hapalops* (humerus;  
964 MNHN.F.SCZ162) and *Glossotherium* (radius;  
965 MNHN.F.PAM756), though not as porous as that  
966 of most extant sloths. A dedicated analysis of  
967 extinct sloths' CC is required to investigate this trait  
968 and possibly use it to inform metabolic rate  
969 reconstruction in extinct sloths.

970 Comparison of long bone's cross-sections  
971 among specimens should be performed at the  
972 same location, usually defined as a percentage of  
973 the bone's length (e.g., Ruff & Hayes 1983). Here,

974 mid-diaphysis (i.e., 50% of bone length) was  
975 selected for complete bones, and, for fragmentary  
976 specimens (some fossils), it is the preserved level  
977 closest to mid-diaphysis that was used (the other  
978 specimens were resampled accordingly). Because  
979 of the xenarthran bones' morphology, most  
980 examined cross-sections were located at the level  
981 of a prominent bony process. One could therefore  
982 consider selecting cross-sections avoiding those  
983 processes to test their influence on bone structural  
984 parameters. Acquiring cross-sectional properties  
985 along the whole diaphysis and assessing the  
986 proximodistal evolution of biomechanical  
987 properties can also be considered for complete  
988 bones (Houssaye & Botton-Divet 2018).

989 In addition to lifestyle, one can expect that the  
990 factors affecting bone structure are the individual's  
991 age, health status, and possibly other features  
992 varying intraspecifically (such as sex differences;  
993 Eckstein et al. 2007). Details regarding these  
994 potential factors are mostly unknown for fossils  
995 (and often for recent specimens as well). To  
996 control for these factors as much as feasible, the  
997 sampled specimens were chosen to be devoid of  
998 apparent bone diseases and skeletally mature  
999 (even though several presented a remnant of  
1000 epiphyseal line, see above). It is our assumption  
1001 that variations in bone structure that relate to a  
1002 different lifestyle can be expected to be of greater  
1003 magnitude than intraspecific variations. But this  
1004 chiefly remains to be demonstrated.

## CONCLUSION

1005 Bone structure of the diaphysis and epiphyses  
1006 of the third metacarpal, humerus, and radius was  
1007 here investigated in several species of extinct  
1008 sloths, comparing it to that of extant xenarthrans.  
1009 Related parameters were successfully acquired  
1010 and included in phylogenetically flexible  
1011 discriminant analyses. The latter constitute, to our  
1012 knowledge, the first analyses that conjointly  
1013 include both diaphyseal and trabeculae  
1014 parameters to discriminate lifestyles. However, no  
1015 extinct sloths are here confidently ascribed to one  
1016 of the lifestyles exhibited by extant xenarthrans.  
1017 This might be due to several factors, and we  
1018 identified as challenges for the present analysis  
1019 the lack of discrimination power of some  
1020 parameters, the difficulties raised by size-  
1021 correlated parameters, and the fact that some  
1022 parameters fall outside the range described by  
1023 extant taxa. The humeral and radial structure of  
1024 the small-sized *Hapalops*, from the Miocene of  
1025 Argentina, was nevertheless found as more  
1026 reminiscent of that of extant sloths, which agrees

## PREPRINT

1028 with the conclusions drawn based on gross 1080  
1029 morphology. The humeral and radial structure of 1081  
1030 the large-sized *Lestodon*, from the Pleistocene of 1082  
1031 Argentina, clearly departs from that of extant 1083  
1032 sloths, and is more similar to that of anteaters and 1084  
1033 armadillos. The singular bone structure of 1085  
1034 xenarthrans, including a medullary cavity filled with 1086  
1035 spongy bone in most taxa, and a low cortical 1087  
1036 compactness in extant sloths, deserves further 1088  
1037 investigation. Because Xenarthra is argued to be 1089  
1038 one of the four early diverging clades of placental 1090  
1039 mammals (Delsuc & Douzery 2008; Asher et al. 1091  
1040 2009; Gaudin & Croft 2015), such investigations 1092  
1041 are not only important for the understanding of the 1093  
1042 evolutionary history of the clade, but potentially for 1094  
1043 that of Mammalia as well.

## 1044 **AKNOWLEDGEMENTS**

1045 We warmly thank the following curators and 1095  
1046 collection managers: Guillaume Billet (Muséum 1096  
1047 national d'Histoire naturelle, Paris; MNHN), Cástor 1097  
1048 Cartelle (Museu de Ciencias Naturais da Pontifícia 1098  
1049 Universidade Católica de Minas Gerais, Belo 1099  
1050 Horizonte, Brazil), Anneke H. van Heteren 1100  
1051 (Zoologische Staatssammlung München), Frieder 1101  
1052 Mayer and Christiane Funk (Museum für 1102  
1053 Naturkunde Berlin), Thomas Kaiser and Nelson 1103  
1054 Ribeiro Mascarenhas (Universität Hamburg), Irina 1104  
1055 Ruf and Katrin Krohmann (Senckenberg 1105  
1056 Forschungsinstitut und Naturmuseum), Stefan 1106  
1057 Merker (Staatlichen Museums für Naturkunde 1107  
1058 Stuttgart), Eva Bärmann (Zoologische 1108  
1059 Forschungsmuseum Alexander Koenig). Anneke 1109  
1060 H. van Heteren (Zoologische Staatssammlung 1110  
1061 München), Patrick Arnold (Friedrich-Schiller- 1111  
1062 Universität Jena), and Aurore Canoville (NC State 1112  
1063 University) are acknowledged for helping with 1113  
1064 acquisition of the extant species scans. We thank 1114  
1065 Patricia Wills, Marta Bellato, and Maité Adam 1115  
1066 (AST-RX platform, MNHN) for acquiring the extinct 1116  
1067 species scans. We acknowledge Luis D. Verde 1117  
1068 Arregoitia for his help with the function pFDA. 1118  
1069 Andrew Pitsillides (acting as a reviewer), an 1119  
1070 anonymous reviewer, Alexandra Houssaye (acting 1120  
1071 as a PCI recommender) and an additional PCI 1121  
1072 recommender are thanked for the improvement 1122  
1073 they brought to the manuscript.

## 1074 **ADDITIONAL INFORMATION**

### 1075 **Funding**

1076 This research received support from the 1121  
1077 SYNTHESYS Project 1122  
1078 <http://www.SYNTHESYS.info/> which is financed by 1123  
1079 European Community Research Infrastructure 1124

Action under the FP7 Integrating Activities 1080  
Programme. EA was funded by the Alexander von 1081  
Humboldt Foundation. JAN and EA were funded 1082  
by the German Research Council (DFG EXC 1027 1083  
and DFG AM 517/1-1, respectively).

### 1085 **Competing interests**

The authors declare they have no personal or 1086  
financial conflict of interest relating to the content 1087  
of this preprint. 1088

### 1089 **Author contributions**

Conceptualization and methodology, EA, JAN; 1090  
Formal analysis, EA; Investigation, EA; Writing – 1091  
Original draft, EA; Writing – Review & editing, EA, 1092  
JAN. All authors gave final approval for publication. 1093

### 1094 **Data availability**

All the raw scans of fossil specimens sampled 1095  
for the present analysis will be available from the 1096  
MNHN collection database pending an embargo. 1097  
The extant species specimens sampled come from 1098  
various collections. The corresponding raw scans 1099  
are available upon reasonable request to the 1100  
authors. 1101

### 1102 **Supplementary information**

SOM 1. Raw data. Excel document, of which 1103  
each worksheet corresponds to a sampled region. 1104

SOM 2. ImageJ macro to crop isometrically a 1105  
stack in 3D. 1106

SOM 3. ImageJ macro to acquire mid-diaphyseal 1107  
parameters. 1108

SOM 4. Lifestyle classification of the extant taxa, 1109  
the training data of the phylogenetically flexible 1110  
discriminant analyses (one analysis was performed 1111  
per extinct taxon, each on a different worksheet). 1112

SOM 5. Canonical coefficients for each 1113  
phylogenetically flexible discriminant analysis (one 1114  
analysis was performed per extinct taxon, each on 1115  
a different worksheet). 1116

## 1117 **REFERENCES**

- 1118 Abba, A. M., and M. Superina. 2016. *Dasyopus* 1119  
*hybridus* (Cingulata: Dasypodidae). 1120  
Mammalian Species 48:10–20.
- 1121 Amson, E., C. Argot, H. G. McDonald, and C. de 1122  
Muizon. 2015a. Osteology and functional 1123  
morphology of the hind limb of the marine 1124  
sloth *Thalassocnus* (Mammalia, Tardigrada).

PREPRINT

- 1125 Journal of Mammalian Evolution 22:355–419. 1174 31:853–864.
- 1126 Amson, E., C. Argot, H. G. McDonald, and C. de 1175 Barak, M. M., D. E. Lieberman, and J.-J. Hublin.  
1127 Muizon. 2015b. Osteology and functional 1176 2011. A Wolff in sheep's clothing: Trabecular  
1128 morphology of the axial postcranium of the 1177 bone adaptation in response to changes in  
1129 marine sloth *Thalassocnus* (Mammalia, 1178 joint loading orientation. *Bone* 49:1141–1151.
- 1130 Tardigrada) with paleobiological implications.  
1131 Journal of Mammalian Evolution 22:473–518. 1179 Barak, M. M., D. E. Lieberman, D. Raichlen, H.  
1180 Pontzer, A. G. Warrener, and J. J. Hublin.  
1132 Amson, E., P. Arnold, A. H. van Heteren, A. 1181 2013. Trabecular evidence for a human-like  
1133 Canoville, and J. A. Nyakatura. 2017a. 1182 gait in *Australopithecus africanus*. *PLoS ONE*  
1134 Trabecular architecture in the forelimb 1183 8.  
1135 epiphyses of extant xenarthrans (Mammalia).  
1136 *Frontiers in Zoology* 14:52. 1184 Bargo, M. S., N. Toledo, and S. F. Vizcaíno. 2012.  
1185 Paleobiology of the Santacrucian sloths and  
1137 Amson, E., G. Billet, and C. de Muizon. 2018. 1186 anteaters (*Xenarthra*, *Pilosa*). Pp. 216–242 in  
1138 Evolutionary adaptation to aquatic lifestyle in 1187 S. F. Vizcaíno, R. F. Kay, and M. S. Bargo,  
1139 extinct sloths can lead to systemic alteration 1188 eds. *Early Miocene Paleobiology in*  
1140 of bone structure. *Proceedings of the Royal 1189 Patagonia: High-Latitude Paleocommunities*  
1141 Society B 285:20180270. 1190 of the Santa Cruz Formation. Cambridge  
1191 University Press, Cambridge.
- 1142 Amson, E., J. D. Carrillo, and C. Jaramillo. 2016. 1192 Bargo, M. S., and S. F. Vizcaíno. 2008.  
1143 Neogene sloth assemblages (Mammalia, 1193 Paleobiology of Pleistocene ground sloths  
1144 *Pilosa*) of the Cocinetas Basin (La Guajira, 1194 (*Xenarthra*, *Tardigrada*): biomechanics,  
1145 Colombia): implications for the Great 1195 morphogeometry and ecomorphology applied  
1146 American Biotic Interchange. *Palaeontology* 1196 to the masticatory apparatus. *Ameghiniana*  
1147 59. 1197 45:175–196.
- 1148 Amson, E., and C. Kolb. 2016. Scaling effect on 1198 Bargo, M. S., S. F. Vizcaíno, F. M. Archuby, and R.  
1149 the mid-diaphysis properties of long bones— 1199 E. Blanco. 2000. Limb bone proportions,  
1150 the case of the Cervidae (deer). *The Science 1200 strength and digging in some Lujanian (late*  
1151 of Nature 103:58. 1201 Pleistocene-early Holocene) mylodontid  
1202 ground sloths (Mammalia, *Xenarthra*).  
1152 Amson, E., C. de Muizon, and T. J. Gaudin. 2017b. 1203 *Journal of Vertebrate Paleontology* 20:601–  
1153 A reappraisal of the phylogeny of the 1204 610.
- 1154 *Megatheria* (Mammalia: *Tardigrada*), with an 1205 Biewener, A. A., N. L. Fazzalari, D. D.  
1155 emphasis on the relationships of the 1206 Konieczynski, and R. V. Baudinette. 1996.  
1156 *Thalassocninae*, the marine sloths. 1207 Adaptive changes in trabecular architecture  
1157 *Zoological Journal of the Linnean Society* 1208 in relation to functional strain patterns and  
1158 179:217–236. 1209 disuse. *Bone* 19:1–8.
- 1159 Amson, E., C. de Muizon, M. Laurin, C. Argot, and 1209 Carlini, A. A., R. Pascual, M. A. Reguero, G. J.  
1160 V. de Buffrénil. 2014. Gradual adaptation of 1210 Scillato-Yané, E. P. Tonni, and S. F.  
1161 bone structure to aquatic lifestyle in extinct 1211 Vizcaíno. 1990. The first Paleogene land  
1162 sloths from Peru. *Proceedings of the Royal 1212 placental mammal from Antarctica: its*  
1163 Society B: Biological Sciences 1213 paleoclimatic and paleobrogeographical  
1164 281:20140192. 1214 bearings. P. 325 in B. Cox and J. Reveal,  
1215 eds. *Abstracts IV International Congress of*  
1165 Amson, E., and J. A. Nyakatura. 2017. The 1216 *Systematic and Evolutionary Biology*.  
1166 postcranial musculoskeletal system of 1217 University of Maryland, Baltimore, MD.
- 1167 *Xenarthrans*: Insights from over two centuries 1218  
1168 of research and future directions. *Journal of 1219*  
1169 *Mammalian Evolution*, doi: 10.1007/s10914- 1220  
1170 017-9408-7. 1221
- 1171 Asher, R. J., N. Bennett, and T. Lehmann. 2009. 1221 Cartelle, C., G. De Iuliis, and R. L. Ferreira. 2009.  
1172 The new framework for understanding 1222 Systematic revision of tropical Brazilian  
1173 placental mammal evolution. *BioEssays* 1223 scelidotheriine sloths (*Xenarthra*,  
*Mylodontoidea*). *Journal of Vertebrate*  
*Paleontology* 29:555–566.

PREPRINT

- 1224 Carter, D. R., and G. S. Beaupré. 2001. Skeletal 1274  
 1225 Function and form. Cambridge University 1275  
 1226 Press, Cambridge. 1276  
 1277
- 1227 Coombs, M. C. 1983. Large mammalian clawed 1278  
 1228 herbivores: a comparative study. 1279  
 1229 Transactions of the American Philosophical 1280  
 1230 Society, New series 73:1–96. 1280
- 1231 Coutier, F., L. Hautier, R. Cornette, E. Amson, and 1281  
 1232 G. Billet. 2017. Orientation of the lateral 1282  
 1233 semicircular canal in Xenarthra and its links 1283  
 1234 with head posture and phylogeny. Journal of 1284  
 1235 Morphology 278. 1285
- 1236 Delsuc, F., F. M. Catzeflis, M. J. Stanhope, and E. 1286  
 1237 J. Douzery. 2001. The evolution of 1287  
 1238 armadillos, anteaters and sloths depicted by 1288  
 1239 nuclear and mitochondrial phylogenies: 1289  
 1240 implications for the status of the enigmatic 1290  
 1241 fossil *Eurotamandua*. Proceedings of the 1291  
 1242 Royal Society B 268:1605–1615. 1292
- 1243 Delsuc, F., and E. J. P. Douzery. 2008. Recent 1293  
 1244 advances and future prospects in xenarthran 1294  
 1245 molecular phylogenetics. Pp. 11–23 in S. F. 1295  
 1246 Vizcaino and W. J. Loughry, eds. The Biology 1296  
 1247 of the Xenarthra. University Press of Florida, 1297  
 1248 Gainesville. 1298
- 1249 Delsuc, F., M. Kuch, G. C. Gibb, J. Hughes, P. 1299  
 1250 Szpak, J. Southon, J. Enk, A. T. Duggan, and 1300  
 1251 H. N. Poinar. 2018. Resolving the 1301  
 1252 phylogenetic position of Darwin's extinct 1302  
 1253 ground sloth (*Myiodon darwini*) using 1303  
 1254 mitogenomic and nuclear exon data. 1304  
 1255 Proceedings of the Royal Society B 1305  
 1256 285:20180214. 1306
- 1257 DeSilva, J. M., and M. J. Devlin. 2012. A 1307  
 1258 comparative study of the trabecular bony 1308  
 1259 architecture of the talus in humans, non- 1309  
 1260 human primates, and *Australopithecus*. 1310  
 1261 Journal of Human Evolution 63:536–551. 1311
- 1262 Doube, M., M. M. Kłosowski, I. Arganda-Carreras, 1312  
 1263 F. P. Cordelières, R. P. Dougherty, J. S. 1313  
 1264 Jackson, B. Schmid, J. R. Hutchinson, and S. 1314  
 1265 J. Shefelbine. 2010. BoneJ: Free and 1315  
 1266 extensible bone image analysis in ImageJ. 1316  
 1267 Bone 47:1076–1079. 1317
- 1268 Eckstein, F., M. Matsuura, V. Kuhn, M. Priemel, R. 1318  
 1269 Müller, T. M. Link, and E. M. Lochmüller. 1319  
 1270 2007. Sex differences of human trabecular 1320  
 1271 bone microstructure in aging are site- 1321  
 1272 dependent. Journal of Bone and Mineral 1322  
 1273 Research 22:817–824. 1323
- Eleazer, C. D., and R. Jankauskas. 2016. 1324  
 Mechanical and metabolic interactions in 1325  
 cortical bone development. American Journal 1326  
 of Physical Anthropology 160:317–333. 1327
- Fariña, R. A., and R. E. Blanco. 1996. 1328  
*Megatherium*, the stabber. Proceedings of 1329  
 the Royal Society B 263:1725–1729. 1330
- Fariña, R. A., S. F. Vizcaino, and M. S. Bargo. 1331  
 1998. Body mass estimations in Lujanian 1332  
 (late Pleistocene-early Holocene of South 1333  
 America) mammal megafauna. 1334  
 Mastozoología Neotropical 5:87–108. 1335
- Flynn, J. J., and C. C. Swisher III. 1995. Cenozoic 1336  
 South American land mammal ages: 1337  
 correlation to global geochronologies. 1338  
 Geochronology Time Scales and Global 1339  
 Stratigraphic Correlation, SEPM Special 1340  
 Publication 54:317–333. 1341
- Gaudin, T. J. 2004. Phylogenetic relationships 1342  
 among sloths (Mammalia, Xenarthra, 1343  
 Tardigrada): the craniodental evidence. 1344  
 Zoological Journal of the Linnean Society 1345  
 140:255–305. 1346
- Gaudin, T. J., and D. A. Croft. 2015. Paleogene 1347  
 Xenarthra and the evolution of South 1348  
 American mammals. Journal of Mammalogy 1349  
 96:622–634. 1350
- Georgiou, L., T. L. Kivell, D. H. Pahr, and M. M. 1351  
 Skinner. 2018. Trabecular bone patterning in 1352  
 the hominoid distal femur. PeerJ 6:e5156. 1353
- Germain, D., and M. Laurin. 2005. Microanatomy 1354  
 of the radius and lifestyle in amniotes 1355  
 (Vertebrata, Tetrapoda). Zoologica Scripta 1356  
 34:335–350. 1357
- Gibb, G. C., F. L. Condamine, M. Kuch, J. Enk, N. 1358  
 Moraes-Barros, M. Superina, H. N. Poinar, 1359  
 and F. Delsuc. 2016. Shotgun mitogenomics 1360  
 provides a reference phylogenetic framework 1361  
 and timescale for living xenarthrans. 1362  
 Molecular Biology and Evolution 33:621–642. 1363
- Griffin, N. L., K. D'Août, T. M. Ryan, B. G. 1364  
 Richmond, R. A. Ketcham, and A. Postnov. 1365  
 2010. Comparative forefoot trabecular bone 1366  
 architecture in extant hominids. Journal of 1367  
 human evolution 59:202–13. 1368
- Gross, T., T. L. Kivell, M. M. Skinner, N. H. 1369  
 Nguyen, and D. H. Pahr. 2014. A CT-image- 1370  
 based framework for the holistic analysis of 1371

PREPRINT

- 1322 cortical and trabecular bone morphology. 1370  
 1323 Palaeontologia Electronica 17:1–13. 1371  
 1372  
 1324 Hammer, A. 2010. The structure of the femoral 1373  
 1325 neck: A physical dissection with emphasis on  
 1326 the internal trabecular system. Annals of 1374  
 1327 Anatomy 192:168–177. 1375  
 1376  
 1328 Han, S., and M. M. Garner. 2016. Soft tissue 1377  
 1329 mineralization in captive 2-toed sloths. 1378  
 1330 Veterinary Pathology 53:659–665. 1379  
 1331 Hayssen, V. 2010. *Bradypus variegatus* (Pilosa: 1380  
 1332 Bradypodidae). Mammalian Species 42:19– 1381  
 1333 32. 1382  
 1334 Houssaye, A., and L. Botton-Divet. 2018. From 1383  
 1335 land to water: evolutionary changes in long 1384  
 1336 bone microanatomy of otters (Mammalia: 1385  
 1337 Mustelidae). Biological Journal of the Linnean 1386  
 1338 Society, doi: 10.1093/biolinnean/bly118. 1387  
 1339 Houssaye, A., K. Waskow, S. Hayashi, A. H. Lee, 1388  
 1340 and J. R. Hutchinson. 2015. Biomechanical 1389  
 1341 evolution of solid bones in large animals: a 1390  
 1342 microanatomical investigation. Biological 1391  
 1343 Journal of the Linnean Society 117:350–371. 1392  
 1393  
 1344 Huynh Nguyen, N., D. H. Pahr, T. Gross, M. M. 1394  
 1345 Skinner, and T. L. Kivell. 2014. Micro-finite 1395  
 1346 element ( $\mu$ FE) modeling of the siamang 1396  
 1347 (*Symphalangus syndactylus*) third proximal 1397  
 1348 phalanx: The functional role of curvature and 1398  
 1349 the flexor sheath ridge. Journal of Human 1399  
 1350 Evolution 67:60–75. 1400  
 1351 Kay, R. F., B. J. Macfadden, R. H. Madden, H. 1401  
 1352 Sandeman, and F. Anaya. 1998. Revised 1402  
 1353 age of the salla beds, Bolivia, and its bearing 1403  
 1354 on the age of the deseadan South American 1404  
 1355 land mammal “age.” Journal of Vertebrate 1405  
 1356 Paleontology 18:189–199. 1406  
 1357 Kivell, T. L. 2016. A review of trabecular bone 1407  
 1358 functional adaptation: what have we learned 1408  
 1359 from trabecular analyses in extant hominoids 1409  
 1360 and what can we apply to fossils? Journal of 1410  
 1361 Anatomy 228:569–594. 1411  
 1362 Kivell, T. L., M. M. Skinner, R. Lazenby, and J.-J. 1412  
 1363 Hublin. 2011. Methodological considerations 1413  
 1364 for analyzing trabecular architecture: an 1414  
 1365 example from the primate hand. Journal of 1415  
 1366 anatomy 218:209–25.  
 1367 Kolb, C., T. M. Scheyer, K. Veitschegger, A. M.  
 1368 Forasiepi, E. Amson, A. A. E. Van der Geer,  
 1369 L. W. Van den Hoek Ostende, S. Hayashi, and M. R. Sánchez-Villagra. 2015. Mammalian bone palaeohistology: A survey and new data with emphasis on island forms. PeerJ 2015.  
 Lazenby, R. A., D. M. L. Cooper, S. Angus, and B. Hallgrímsson. 2008. Articular constraint, handedness, and directional asymmetry in the human second metacarpal. Journal of Human Evolution 54:875–885.  
 Matthew, W. D. 1912. The ancestry of edentates: as illustrated by the skeleton of *Hapalops*, a tertiary ancestor of the ground sloths. American Museum Journal 12:300–303.  
 Mccoy, M. W., B. M. Bolker, C. W. Osenberg, B. G. Miner, and J. R. Vonesh. 2006. Size correction: Comparing morphological traits among populations and environments. Oecologia 148:547–554.  
 Meier, P. S., C. Bickelmann, T. M. Scheyer, D. Koyabu, and M. R. Sánchez-Villagra. 2013. Evolution of bone compactness in extant and extinct moles (Talpidae): exploring humeral microstructure in small fossorial mammals. BMC evolutionary biology 13:55.  
 Mielke, F., E. Amson, and J. A. Nyakatura. 2018a. Morpho-functional analysis using procrustes superimposition by static reference. Evolutionary Biology, doi: 10.1007/s11692-018-9456-9.  
 Mielke, M., J. Wölfer, A. H. van Heteren, E. Amson, and J. A. Nyakatura. 2018b. Trabecular architecture in the sciuriform femoral head: allometry and functional adaptation. Zoological Letters 4:10.  
 Montañez-Rivera, I., J. A. Nyakatura, and E. Amson. 2018. Bone cortical compactness in “tree sloths” reflects convergent evolution. Journal of Anatomy, doi: 10.1111/joa.12873.  
 Motani, R., and L. Schmitz. 2011. Phylogenetic versus functional signals in the evolution of form–function relationships in terrestrial vision. Evolution 65:2245–2257.  
 Nyakatura, J. A. 2012. The convergent evolution of suspensory posture and locomotion in tree sloths. Journal of Mammalian Evolution 19:225–234.  
 Owen, R. 1839. Part I. Fossil Mammalia. Pp. 1–111 in C. Darwin, ed. The Zoology of the

PREPRINT

- 1418 Voyage of HMS Beagle. Smith Elder and Co, 1467  
 1419 London. 1468  
 1469
- 1420 Owen, R. 1861. Memoir on the *Megatherium*, or 1470  
 1421 giant ground-sloth of America (*Megatherium*  
 1422 *americanum*, Cuvier). Williams and Norgate, 1471  
 1423 London. 1472  
 1473
- 1424 Pagel, M. 1999. Inferring the historical patterns of 1474  
 1425 biological evolution. *Nature* 401:877–884. 1475
- 1426 Patiño, S. J., and R. A. Fariña. 2017. Ungual 1476  
 1427 phalanges analysis in Pleistocene ground 1477  
 1428 sloths (*Xenarthra*, *Folivora*). *Historical* 1478  
 1429 *Biology* 29:1065–1075. 1479  
 1480
- 1430 Perkins, M. E., J. G. Fleagle, M. T. Heizler, B. 1481  
 1431 Nash, T. M. Bown, A. A. Tauber, and M. T.  
 1432 Dozo. 2012. Tephrochronology of the 1482  
 1433 Miocene Santa Cruz and Pinturas 1483  
 1434 Formations, Argentina. Pp. 23–40 *in* S. F. 1484  
 1435 Vizcaíno, R. F. Kay, and M. S. Bargo, eds. 1485  
 1436 Early Miocene Paleobiology in Patagonia: 1486  
 1437 high-latitude paleocommunities of the Santa  
 1438 Cruz Formation. Cambridge University Press, 1487  
 1439 Cambridge. 1488  
 1489
- 1440 Pontzer, H., D. E. Lieberman, E. Momin, M. J. 1490  
 1441 Devlin, J. D. Polk, B. Hallgrímsson, and D. M.  
 1442 L. Cooper. 2006. Trabecular bone in the bird 1491  
 1443 knee responds with high sensitivity to 1492  
 1444 changes in load orientation. *The Journal of* 1493  
 1445 *Experimental Biology* 209:57–65. 1494  
 1495
- 1446 Pujos, F., T. J. Gaudin, G. De Iuliis, and C. 1496  
 1447 Cartelle. 2012. Recent advances on 1497  
 1448 variability, morpho-functional adaptations, 1498  
 1449 dental terminology, and evolution of sloths. 1499  
 1450 *Journal of Mammalian Evolution* 19:159–169. 1500
- 1451 Ruff, C. B., and W. C. Hayes. 1983. Cross- 1501  
 1452 sectional geometry of Pecos Pueblo femora 1502  
 1453 and tibiae - a biomechanical investigation: I. 1503  
 1454 Method and general patterns of variation. 1504  
 1455 *American Journal of Physical Anthropology* 1505  
 1456 60:359–81. 1506
- 1457 Ruff, C. B., B. Holt, and E. Trinkaus. 2006. Who's 1507  
 1458 afraid of the big bad Wolff?: "Wolff's law" and 1508  
 1459 bone functional adaptation. *American Journal*  
 1460 *of Physical Anthropology* 129:484–498. 1509  
 1510
- 1461 Ryan, T. M., K. J. Carlson, A. D. Gordon, N. 1511  
 1462 Jablonski, C. N. Shaw, and J. T. Stock. 2018. 1512  
 1463 Human-like hip joint loading in 1513  
 1464 *Australopithecus africanus* and *Paranthropus*  
 1465 *robustus*. *Journal of Human Evolution* 1514  
 1466 121:12–24. 1515
- Ryan, T. M., and R. A. Ketcham. 2002. The three-  
 dimensional structure of trabecular bone in  
 the femoral head of strepsirrhine primates.  
*Journal of Human Evolution* 43:1–26.
- Ryan, T. M., and C. N. Shaw. 2013. Trabecular  
 bone microstructure scales allometrically in  
 the primate humerus and femur. *Proceedings*  
*of the Royal Society B* 280:20130172.
- Schindelin, J., I. Arganda-Carreras, E. Frise, V.  
 Kaynig, M. Longair, T. Pietzsch, S. Preibisch,  
 C. Rueden, S. Saalfeld, B. Schmid, J.-Y.  
 Tinevez, D. J. White, V. Hartenstein, K.  
 Eliceiri, P. Tomancak, and A. Cardona. 2012.  
 Fiji: an open-source platform for biological-  
 image analysis. *Nature Methods* 9:676–682.
- Schindelin, J., C. T. Rueden, M. C. Hiner, and K.  
 W. Eliceiri. 2015. The ImageJ ecosystem: An  
 open platform for biomedical image analysis.  
*Molecular Reproduction and Development*  
 82:518–529.
- Schneider, C. A., W. S. Rasband, and K. W.  
 Eliceiri. 2012. NIH Image to ImageJ: 25 years  
 of image analysis. *Nature Methods* 9:671–  
 675.
- Shaw, C. N., and T. M. Ryan. 2012. Does skeletal  
 anatomy reflect adaptation to locomotor  
 patterns? Cortical and trabecular architecture  
 in human and nonhuman anthropoids.  
*American journal of physical anthropology*  
 147:187–200.
- Skinner, M. M., N. B. Stephens, Z. J. Tsegai, A. C.  
 Foote, N. H. Nguyen, T. Gross, D. H. Pahr, J.  
 Hublin, and T. L. Kivell. 2015. Human-like  
 hand use in *Australopithecus africanus*.  
*Science* 347:395–399.
- Slater, G. J., P. Cui, A. M. Forasiepi, D. Lenz, K.  
 Tsangaras, B. Voirin, N. de Moraes-Barros,  
 R. D. E. MacPhee, and A. D. Greenwood.  
 2016. Evolutionary relationships among  
 extinct and extant sloths: The evidence of  
 mitogenomes and retroviruses. *Genome*  
*Biology and Evolution* 8:607–621.
- Smith, F. A., S. K. Lyons, S. K. M. Ernest, K. E.  
 Jones, D. M. Kaufman, T. Dayan, P. A.  
 Marquet, J. H. Brown, and J. P. Haskell.  
 2003. Body Mass of Late Quaternary  
 Mammals. *Ecology* 84:3403.
- Smith, P., and R. D. Owen. 2017. *Calyptophractus*  
*retusus* (Cingulata: Dasypodidae).

PREPRINT

|      |                                                             |      |                                                         |
|------|-------------------------------------------------------------|------|---------------------------------------------------------|
| 1516 | Mammalian Species 49:57–62.                                 | 1558 | Pleistocene Sloths. PhD Thesis, University of Colorado. |
| 1517 | Sode, M., A. J. Burghardt, R. A. Nissenson, and S.          | 1559 |                                                         |
| 1518 | Majumdar. 2008. Resolution dependence of                    | 1560 | Tsegai, Z. J., T. L. Kivell, T. Gross, N. Huynh         |
| 1519 | the mon-metric trabecular structure indices.                | 1561 | Nguyen, D. H. Pahr, J. B. Smaers, and M. M.             |
| 1520 | Bone 42:728–736.                                            | 1562 | Skinner. 2013. Trabecular bone structure                |
|      |                                                             | 1563 | correlates with hand posture and use in                 |
| 1521 | Stephens, N. B., T. L. Kivell, T. Gross, D. H. Pahr,        | 1564 | hominoids. PLoS ONE 8.                                  |
| 1522 | R. A. Lazenby, J.-J. Hublin, I. Hershkovitz,                |      |                                                         |
| 1523 | and M. M. Skinner. 2016. Trabecular                         | 1565 | Tsegai, Z. J., M. M. Skinner, A. H. Gee, D. H.          |
| 1524 | architecture in the thumb of <i>Pan</i> and <i>Homo</i> :   | 1566 | Pahr, G. M. Treece, J.-J. Hublin, and T. L.             |
| 1525 | implications for investigating hand use,                    | 1567 | Kivell. 2017. Trabecular and cortical bone              |
| 1526 | loading, and hand preference in the fossil                  | 1568 | structure of the talus and distal tibia in <i>Pan</i>   |
| 1527 | record. American Journal of Physical                        | 1569 | and <i>Homo</i> . American Journal of Physical          |
| 1528 | Anthropology 161:603–619.                                   | 1570 | Anthropology 163:784–805.                               |
|      |                                                             |      |                                                         |
| 1529 | Stock, C. 1942. A ground sloth in Alaska. Science           | 1571 | Tsegai, Z. J., M. M. Skinner, D. H. Pahr, J.-J.         |
| 1530 | 95:552–553.                                                 | 1572 | Hublin, and T. L. Kivell. 2018. Systemic                |
|      |                                                             | 1573 | patterns of trabecular bone across the human            |
| 1531 | Straehl, F. R., T. M. Scheyer, A. M. Forasiepi, R.          | 1574 | and chimpanzee skeleton. Journal of                     |
| 1532 | D. E. MacPhee, and M. R. Sánchez-Villagra.                  | 1575 | Anatomy 232:641–656.                                    |
| 1533 | 2013. Evolutionary patterns of bone histology               |      |                                                         |
| 1534 | and bone compactness in xenarthran                          | 1576 | Vizcaíno, S. F., M. S. Bargo, and G. H. Cassini.        |
| 1535 | mammal long bones. PLoS ONE 8:e69275.                       | 1577 | 2006. Dental occlusal surface area in relation          |
|      |                                                             | 1578 | to body mass, food habits and other                     |
| 1536 | Su, A., and K. J. Carlson. 2017. Comparative                | 1579 | biological features in fossil xenarthrans.              |
| 1537 | analysis of trabecular bone structure and                   | 1580 | Ameghiniana 43:11–26.                                   |
| 1538 | orientation in South African hominin tali.                  |      |                                                         |
| 1539 | Journal of Human Evolution 106:1–18.                        | 1581 | Vizcaíno, S. F., R. A. Fariña, and G. V. Mazzetta.      |
|      |                                                             | 1582 | 1999. Ulnar dimensions and fossoriality in              |
| 1540 | Su, A., I. J. Wallace, and M. Nakatsukasa. 2013.            | 1583 | armadillos. Acta Theriologica 44:309–320.               |
| 1541 | Trabecular bone anisotropy and orientation in               |      |                                                         |
| 1542 | an Early Pleistocene hominin talus from East                | 1584 | Vizcaíno, S. F., N. Toledo, and M. S. Bargo. 2017.      |
| 1543 | Turkana, Kenya. Journal of Human Evolution                  | 1585 | Advantages and limitations in the use of                |
| 1544 | 64:667–677.                                                 | 1586 | extant xenarthrans (Mammalia) as                        |
|      |                                                             | 1587 | morphological models for paleobiological                |
| 1545 | Tacutu, R., C. T. Craig, A. Budovsky, D. Wuttke,            | 1588 | reconstruction. Journal of Mammalian                    |
| 1546 | G. Lehmann, D. Taranukha, J. Costa, V. E.                   | 1589 | Evolution, doi: 10.1007/s10914-017-9400-2.              |
| 1547 | Fraiefeld, and J. De Magalhães. 2013. Human                 |      |                                                         |
| 1548 | Ageing Genomic Resources: Integrated                        | 1590 | White, J. L. 1997. Locomotor Adaptations in             |
| 1549 | databases and tools for the biology and                     | 1591 | Miocene Xenarthrans. Pp. 246–264 in R. F.               |
| 1550 | genetics of ageing. Nucleic Acids Research                  | 1592 | Kay, R. H. Madden, R. L. Cifelli, and J. J.             |
| 1551 | 41:D1027–D1033.                                             | 1593 | Flynn, eds. Vertebrate paleontology in the              |
|      |                                                             | 1594 | neotropics. The Miocene fauna of La Venta,              |
| 1552 | Toledo, N., M. S. Bargo, and S. F. Vizcaíno. 2013.          | 1595 | Colombia. Smithsonian Institution Press,                |
| 1553 | Muscular reconstruction and functional                      | 1596 | Washington.                                             |
| 1554 | morphology of the forelimb of early Miocene                 |      |                                                         |
| 1555 | sloths ( <i>Xenarthra</i> , <i>Folivora</i> ) of Patagonia. | 1597 | Woodburne, M. O. 2010. The Great American               |
| 1556 | Anatomical record 296:305–325.                              | 1598 | Biotic Interchange: dispersals, tectonics,              |
|      |                                                             | 1599 | climate, sea level and holding pens. Journal            |
| 1557 | Toledo, P. M. 1996. Locomotor Patterns within the           | 1600 | of Mammalian Evolution 17:245–264.                      |



PREPRINT

Table 1. List of fossils with type of data acquired for each bone.

| Species                            | Specimen number | Data type             |               |        |
|------------------------------------|-----------------|-----------------------|---------------|--------|
|                                    |                 | Humerus               | Radius        | Mc III |
| <i>Hapalops</i> sp.                | MNHN.F.SCZ166   | -                     | 72%MD; 100%TA | -      |
| <i>Hapalops</i> sp.                | MNHN.F.SCZ164   | 35%MD; 72%TA; (39%TA) | -             | -      |
| <i>Hapalops</i> sp.                | MNHN.F.SCZ162   | 50%MD; 35%MD; (39%TA) | -             | -      |
| <i>Lestodon armatus</i>            | MNHN.F.PAM754   | -                     | 50%MD         | -      |
| <i>Lestodon armatus</i>            | MNHN.F.PAM755   | -                     | -             | 50%MD  |
| <i>Lestodon armatus</i>            | MNHN.F.PAM95    | 100%TA                | -             | -      |
| <i>Glossotherium robustum</i>      | MNHN.F.PAM756   | QO                    | 50%MD; 100%TA | -      |
| <i>Glossotherium robustum</i>      | MNHN.F.PAM141   | -                     | -             | 50%MD  |
| <i>Scelidotherium leptcephalum</i> | MNHN.F.PAM236   | 50%MD                 | -             | -      |
| <i>Valgipes bucklandi</i>          | MNHN.F.BRD29    | -                     | -             | 50%MD  |
| <i>Megatherium americanum</i>      | MNHN.F.PAM753   | -                     | -             | 50%MD  |
| <i>Megatherium americanum</i>      | MNHN.F.PAM758   | -                     | QO            | -      |

Footnotes. Abbreviations: 'n'-MD, mid-diaphyseal data, with 'n' the position of the sampled cross-section expressed as the length percentage from the proximal end; 'n'-TA, trabecular architecture data, with 'n' the cropping coefficient that was used, if any (see Material and Methods section); QO, only qualitative observations were performed.

PREPRINT

Table 2. Mean values of diaphyseal parameters of interest for each lifestyle category and extinct taxon.

|                         | CSA (mm <sup>2</sup> ) | GC (NU) | CSS (NU) |
|-------------------------|------------------------|---------|----------|
| Mc III diaphysis, 50%MD |                        |         |          |
| Armadillos              | 26.2                   | 69.2    | 2.0      |
| Anteaters               | 56.6                   | 73.8    | 2.1      |
| Extant sloths           | 17.6                   | 62.7    | 1.9      |
| <i>Lestodon</i>         | 1239.6                 | 64.1    | 1.9      |
| <i>Glossotherium</i>    | 1017.8                 | 78.1    | 2.9      |
| <i>Megatherium</i>      | 2100.8                 | 74.8    | 1.3      |
| <i>Valgipes</i>         | 590.9                  | 69.3    | 3.8      |
| Humeral diaphysis, 50%  |                        |         |          |
| Armadillos              | 65.8                   | 68.5    | 4.4      |
| Anteaters               | 144.8                  | 66.5    | 3.0      |
| Extant sloths           | 59.2                   | 72.8    | 1.2      |
| <i>Hapalops</i>         | 229.3                  | 89.8    | 1.2      |
| <i>Scelidotherium</i>   | 2780.8                 | 80.9    | 2.6      |
| Humeral diaphysis, 35%  |                        |         |          |
| Armadillos              | 44.2                   | 46.5    | 2.6      |
| Anteaters               | 117.6                  | 57.5    | 1.8      |
| Extant sloths           | 63.0                   | 64.8    | 1.2      |
| <i>Hapalops</i>         | 235.3                  | 75.3    | 1.8      |
| Radial diaphysis, 50%   |                        |         |          |
| Armadillos              | 17.2                   | 89.0    | 2.7      |
| Anteaters               | 58.0                   | 83.1    | 2.2      |
| Extant sloths           | 31.7                   | 77.2    | 2.2      |
| <i>Lestodon</i>         | 1474.7                 | 71.3    | 5.0      |
| <i>Glossotherium</i>    | 788.3                  | 67.7    | 4.0      |
| Radial diaphysis, 72%   |                        |         |          |
| Armadillos              | 28.4                   | 76.2    | 3.8      |
| Anteaters               | 69.1                   | 77.2    | 2.9      |
| Extant sloths           | 35.1                   | 71.3    | 5.1      |
| <i>Hapalops</i>         | 92.9                   | 79.8    | 6.3      |

Footnotes. Percentage indicates the position of the sampled cross-section, expressed as the length percentage from the proximal end. Abbreviations: NU, no units.

PREPRINT

Table 3. Mean values of trabecular parameters of interest for each lifestyle category and extinct taxon.

|                      | DA (NU) | Conn.D (nb.mm <sup>-3</sup> ) | Tb.Th (mm) | Tb.Sp (mm) | BS/TV (mm <sup>-1</sup> ) | BV/TV (NU) |
|----------------------|---------|-------------------------------|------------|------------|---------------------------|------------|
| Humeral head 100%    |         |                               |            |            |                           |            |
| Armadillos           | 0.60    | 12.35                         | 0.25       | 0.47       | 3.38                      | 0.41       |
| Anteaters            | 0.40    | 11.59                         | 0.26       | 0.41       | 3.43                      | 0.45       |
| Extant sloths        | 0.43    | 9.36                          | 0.31       | 0.49       | 3.14                      | 0.44       |
| <i>Lestodon</i>      | 0.50    | 0.58                          | 0.80       | 0.81       | 1.23                      | 0.58       |
| Humeral head 72%     |         |                               |            |            |                           |            |
| Armadillos           | 0.62    | 12.31                         | 0.24       | 0.46       | 3.57                      | 0.41       |
| Anteaters            | 0.40    | 11.38                         | 0.26       | 0.42       | 3.56                      | 0.45       |
| Extant sloths        | 0.44    | 9.03                          | 0.32       | 0.50       | 3.16                      | 0.45       |
| <i>Hapalops</i>      | 0.52    | 3.22                          | 0.39       | 0.56       | 3.39                      | 0.50       |
| Radial trochlea 100% |         |                               |            |            |                           |            |
| Armadillos           | 0.79    | 16.05                         | 0.34       | 0.37       | 3.87                      | 0.49       |
| Anteaters            | 0.63    | 11.19                         | 0.30       | 0.44       | 3.20                      | 0.44       |
| Extant sloths        | 0.56    | 8.75                          | 0.30       | 0.52       | 2.39                      | 0.40       |
| <i>Hapalops</i>      | 0.60    | 3.03                          | 0.26       | 0.85       | 1.55                      | 0.24       |
| <i>Glossotherium</i> | 0.43    | 1.02                          | 0.43       | 1.25       | 0.59                      | 0.23       |

Footnotes. Percentage indicates the cropping coefficient that was used (100% denoting the lack thereof; see Material and Methods section). Abbreviation: NU, no units.

## PREPRINT

Table 4. Lifestyle classification of the extinct taxa as predicted by phylogenetically flexible discriminant analyses (because of the difference in the included predictive variables for each taxon, a dedicated discriminant analysis was performed for each of them).

|                                     | Predicted class | P(ant) | P(arma) | P(sloth) |
|-------------------------------------|-----------------|--------|---------|----------|
| <i>Hapalops</i>                     | sloth           | 0.00   | 0.00    | 1.00     |
| <i>Lestodon armatus</i>             | arma            | 0.35   | 0.64    | 0.01     |
| <i>Glossotherium robustum</i>       | ant             | 0.50   | 0.25    | 0.25     |
| <i>Scelidotherium leptocephalum</i> | ant             | 0.37   | 0.27    | 0.36     |

Abbreviations: P("class"), the posterior probability for the extinct taxon to be classified as "class"; ant, anteater; arma, armadillo; sloth, extant sloth.

## PREPRINT

### Figure Legends

Figure 1. Timetree depicting the time-calibrated phylogenetic relationships of the xenarthrans included in the phylogenetically flexible linear discriminant analyses. See Material and Methods section for the sources used to build the timetree.

Figure 2. Qualitative observations of diaphyseal structure in xenarthrans. Longitudinal sections of humeri (A-C, E-F, all from CT-scans), tibia (D, 'natural' section), and radius (G, from CT-scan). A, *Chaetophractus vellerosus* (ZSM 1926-24); B, *Priodontes maximus* (ZSM 1931-293); C, *Myrmecophaga tridactyla* (ZMB\_MAM\_77025); D, *Nothrotherium maquinense* (MCL 2821); E, *Choloepus didactylus* (ZMB\_MAM\_35825); F, *Glossotherium robustum* (MNHN.F.TAR 767); G, *Lestodon armatus* (MNHN.F.PAM 754). Scale bars: A-E, 1 cm; F-G, 10 cm.

Figure 3. Univariate comparisons of mid-diaphyseal parameters. A, Mc III Global Compactness (GC); B, Mc III cross-sectional shape (CSS); C, humeral GC; D, humeral CSS; E, radial GC; F, radial CSS. Thresholded mid-diaphyseal virtual sections are depicted for the extinct sloths. Abbreviations: ant, anteaters; arma, armadillos; Glos, *Glossotherium*; Hapa, *Hapalops*; Lest, *Lestodon*; Meg, *Megatherium*; Sce, *Scelidotherium*; sloth, extant sloths.

Figure 4. Univariate comparisons of trabecular anisotropy parameters. A, degree of anisotropy (DA) in the humeral head ROI, reduced at 72% of its maximum size (see Material and Methods section); B, DA in the radial trochlea; C, main direction of the trabeculae (MDT) in the radial trochlea. Abbreviations: ant, anteaters; arma, armadillos; Glos, *Glossotherium*; Hapa, *Hapalops*; sloth, extant sloths.

Figure 5. Phylogenetically flexible linear discriminant analyses using humeral and radial bone structure parameters. One analysis per extinct taxon (referred as of "unknown" class) was performed, because of the difference in the parameters that could be included (see Material and Methods section and Table 1). A,

## PREPRINT

*Hapalops*; B, *Lestodon*; C, *Glossotherium*; D, *Scelidotherium*. Abbreviations: ant, anteaters; arma, armadillos; sloth, extant sloths. Next to each discriminant axis is given between brackets the corresponding percentage of explained between-group variance. The size of extinct sloths' representations gives a rough indication of their body sizes.

Cingulata  
 Vermilingua  
 Tardigrada: "ground sloths"  
 "tree sloths"

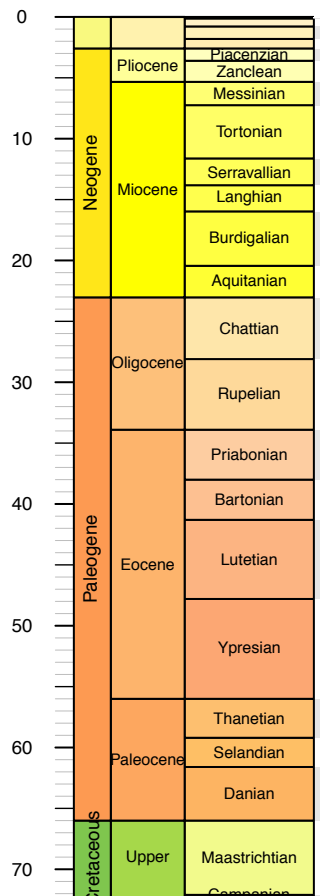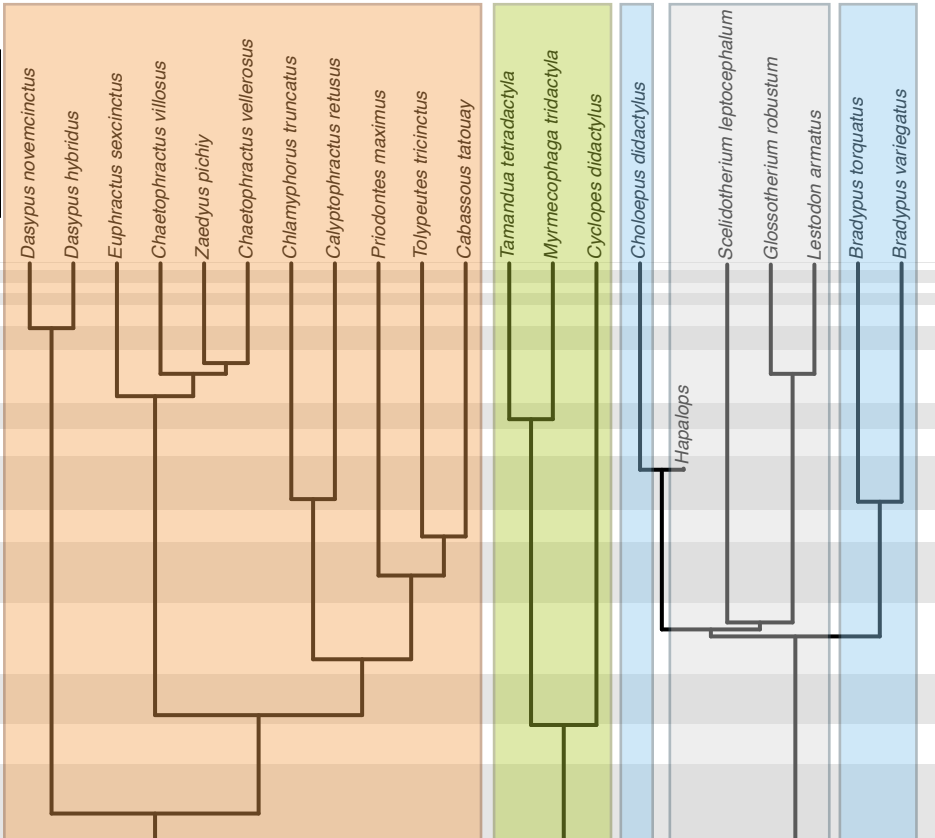

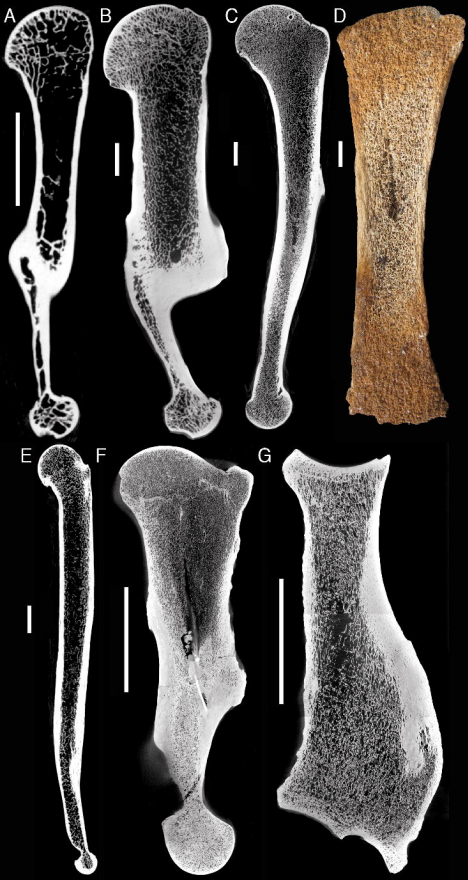



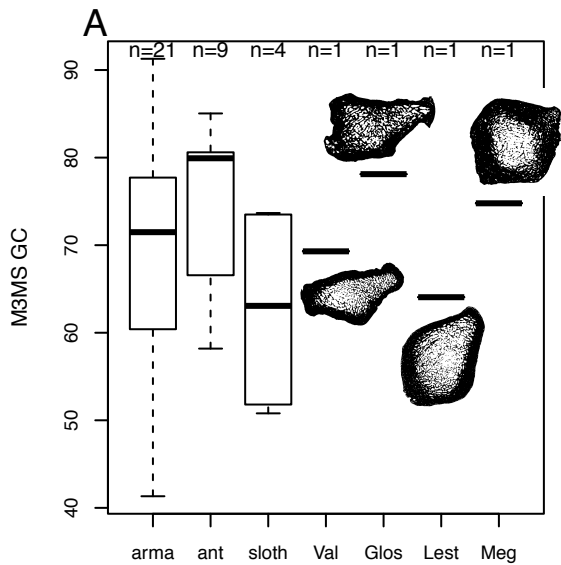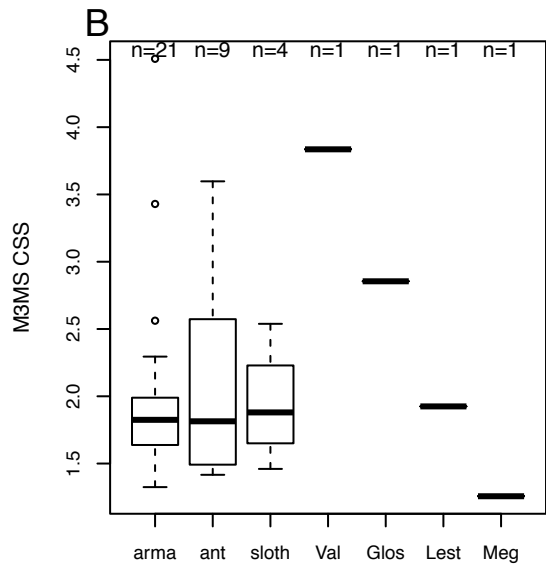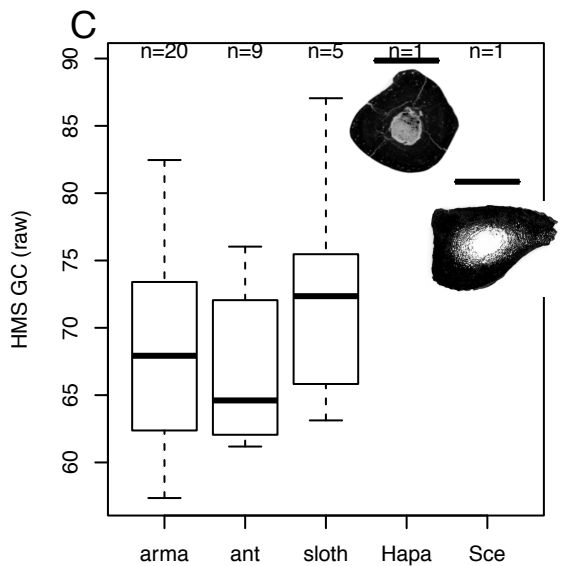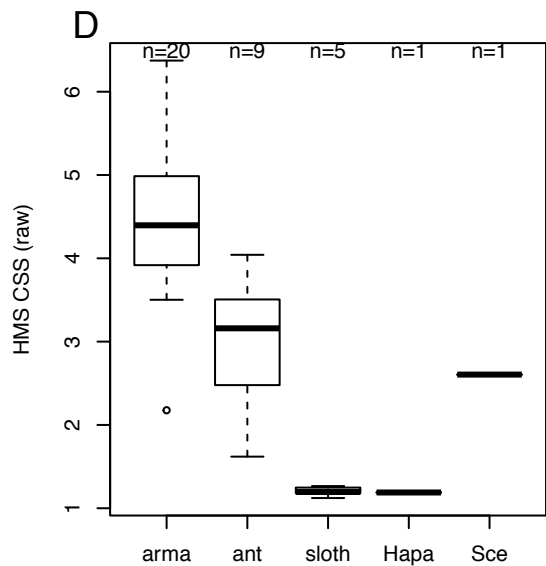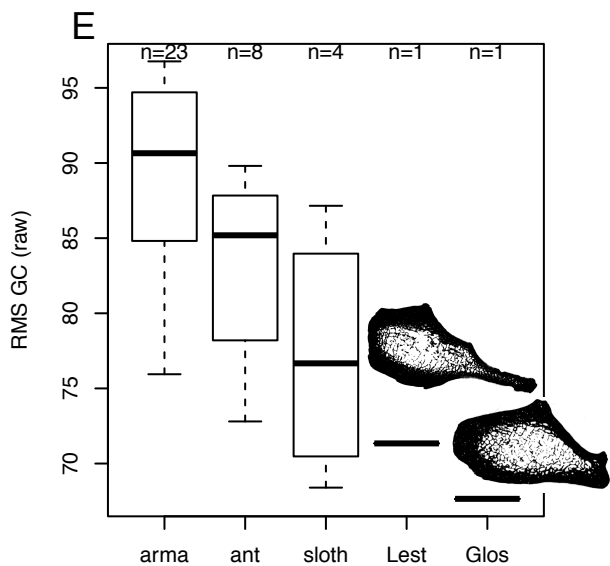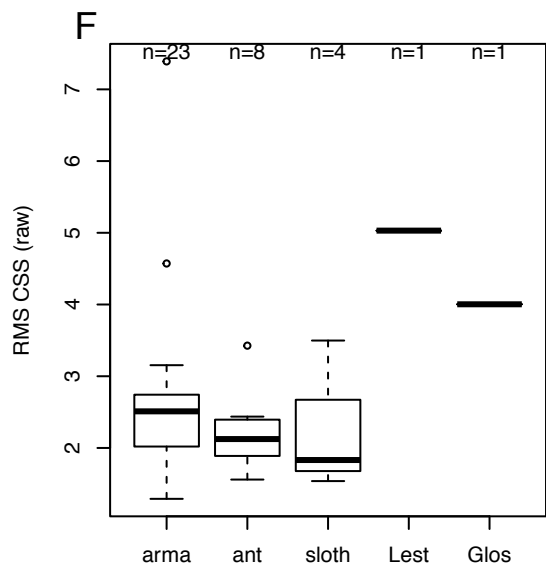

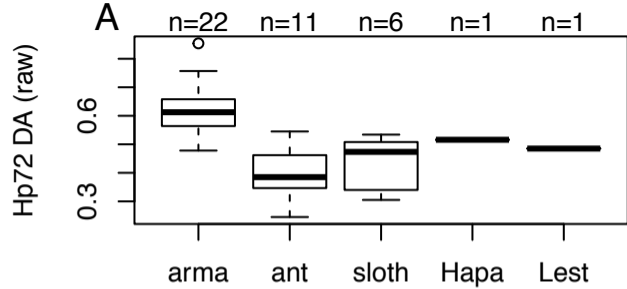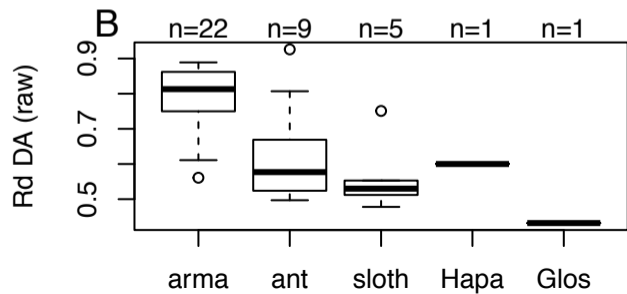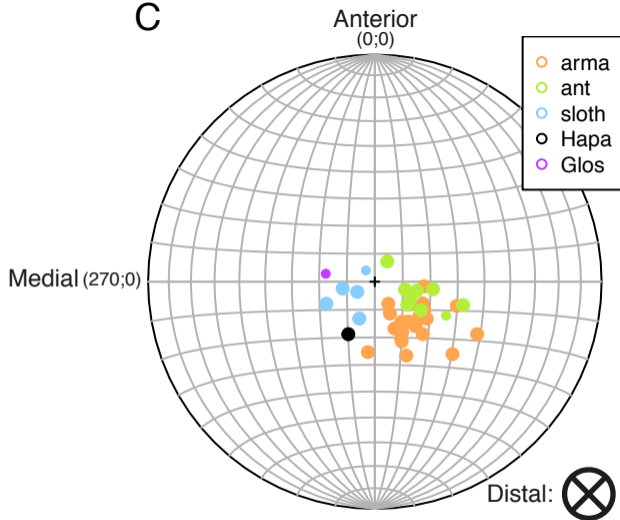

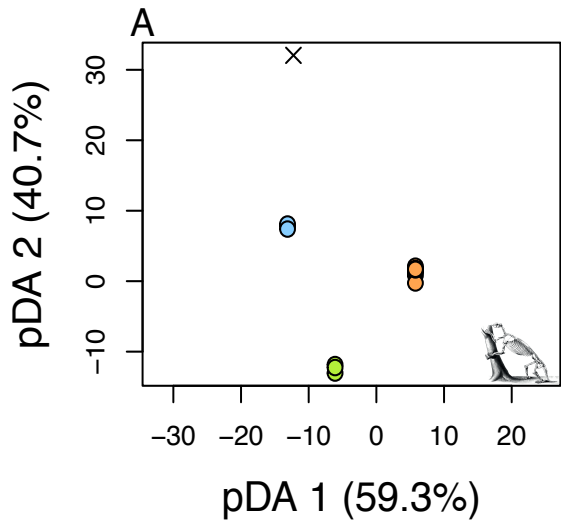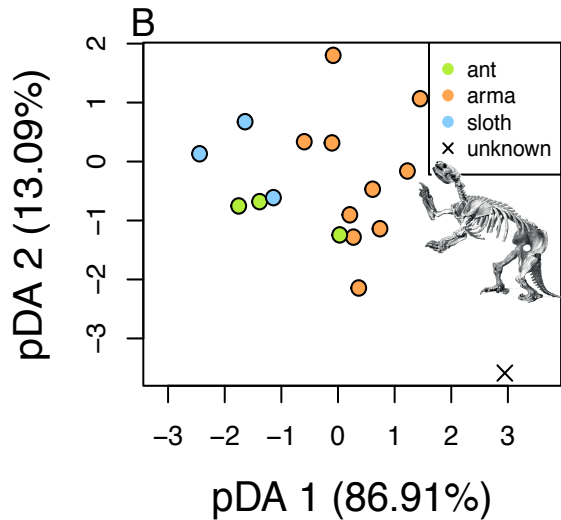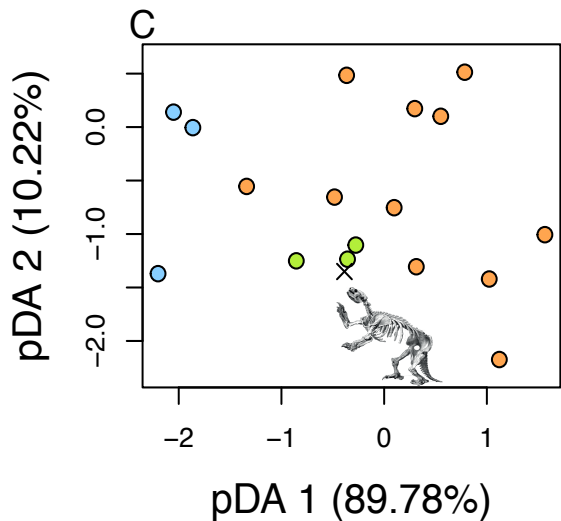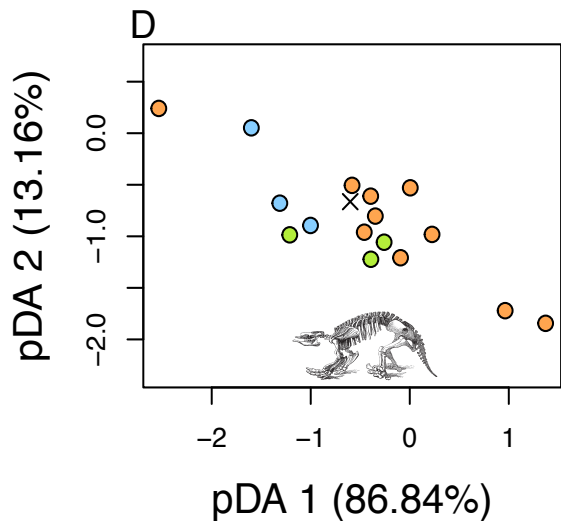

Source: https://www.biorxiv.org/content/10.1101/318121v4.full.pdf
